# Supplementary material for: Efficient and low roll-off solution-processed sky-blue TADF emitters via hetero-donor and space modification strategies
Source: Royal Society of Chemistry journal article supplement (doi:10.1039/d4tc05347h), 2025-01-01
Supplement: d4tc05347h1.pdf [file d4tc05347h1.pdf]

## Supporting Information

### **Efficient and Low Roll-Off Solution-Processed Sky-Blue TADF Emitters via Hetero-Donor and Space Modification Strategies**

**Authors:** Hao-Nan Shi,<sup>a</sup> Feng-Ming Xie,<sup>\*,a</sup> Hao-Ze Li,<sup>b</sup> Yan-Qing Li,<sup>\*,b</sup> Jian-Xin Tang<sup>\*,a,c</sup>

<sup>a</sup> *Jiangsu Key Laboratory for Carbon-Based Functional Materials & Devices, Institute of Functional Nano & Soft Materials (FUNSOM), Soochow University, Suzhou, Jiangsu 215123 (P. R. China)*

<sup>b</sup> *School of Physics and Electronic Science, Ministry of Education Nanophotonics & Advanced Instrument Engineering Research Center, East China Normal University, Shanghai 200062 (P. R. China)*

<sup>c</sup> *Macao Institute of Materials Science and Engineering (MIMSE), Faculty of Innovation Engineering, Macau University of Science and Technology, Taipa, Macao 999078 (P. R. China)*

E-mail: [fmxie@suda.edu.cn](mailto:fmxie@suda.edu.cn) (F.-M. Xie), [yqli@phy.ecnu.edu.cn](mailto:yqli@phy.ecnu.edu.cn) (Y.-Q. Li), [jxtang@must.edu.mo](mailto:jxtang@must.edu.mo) (J.-X. Tang)

---

## Table of Contents

**Fig. S1**  $^1\text{H}$  NMR spectrum of HCB-1.

**Fig. S2**  $^{13}\text{C}$  NMR spectrum of HCB-1.

**Fig. S3**  $^1\text{H}$  NMR spectrum of HCB-2.

**Fig. S4**  $^{13}\text{C}$  NMR spectrum of HCB-2.

**Fig. S5**  $^1\text{H}$  NMR spectrum of HCB-3.

**Fig. S6**  $^{13}\text{C}$  NMR spectrum of HCB-3.

**Fig. S7** TOF-MS spectrum of HCB-1.

**Fig. S8** TOF-MS spectrum of HCB-2.

**Fig. S9** TOF-MS spectrum of HCB-3.

**Fig. S10** TGA curves of HCB-1, HCB-2, and HCB-3.

**Fig. S11** Ellipsoid plot of HCB-1, HCB-2, and HCB-3 obtained by single crystal diffraction.

**Fig. S12** The NTO diagram of HCB-1.

**Fig. S13** The NTO diagram of HCB-2.

**Fig. S14** The NTO diagram of HCB-3.

**Fig. S15** The calculated energies and SOC constants between  $S_1$  and  $T_{1-3}$  states for all TADF emitters.

**Fig. S16** CV diagrams of HCB-1, HCB-2, and HCB-3.

**Fig. S17** PL spectra of HCB-1, HCB-2, and HCB-3 measured in toluene at room-temperature (RT).

**Fig. S18** a) Phosphorescence and PL spectra of HCB-1, HCB-2, and HCB-3 measured in pure film at 77 K. b) PL spectra of HCB-1, HCB-2, and HCB-3 measured in 100 wt% film at RT.

**Fig. S19** PL spectra of HCB-1, HCB-2, and HCB-3 measured in 100 wt% film at room-temperature (RT).

**Fig. S20** PL spectra of a) HCB-1, b) HCB-2, and c) HCB-3 in various solvents (n-H: n-hexane, Tol: toluene, Diox: 1,4-dioxane, THF: tetrahydrofuran, DCM: dichloromethane).

**Fig. S21** PL spectra of a) HCB-1, b) HCB-2, and c) HCB-3 in THF/ $\text{H}_2\text{O}$  mixtures with

---

different water fractions ( $f_w = 0\% \sim 90\%$ ).

**Fig. S22** The doping concentration dependence on PLQY of HCB-1, HCB-2 and HCB-3 in mCP.

**Fig. S23** Transient PL decay curves of a) HCB-1, b) HCB-2, and c) HCB-3 in 100 wt% films.

**Fig. S24** Temperature-dependent TRPL of a) HCB-1, b) HCB-2, and c) HCB-3 in doped films.

**Fig. S25** Temperature-dependent TRPL of a) HCB-1, b) HCB-2, and c) HCB-3 in doped films.

**Fig. S26** AFM images of 20 wt% doped films. a) HCB-1 (RMS=0.373 nm), b) HCB-2 (RMS=0.349 nm), c) HCB-3 (RMS=0.376 nm). (Solution-processed films structure: ITO/PEDOT: PSS/PVK/mCP: TADF emitter).

**Fig. S27** EL spectra and EQE of HCB-1 (a, d), HCB-2 (b, e) and HCB-3 (c, f) with PVK and without PVK.

**Fig. S28** EL spectra and EQE of HCB-2 (a, b) using mCP and mCBP.

**Fig. S29** a) Energy-level diagram. b) Molecular structures employed in the devices.

**Fig. S30** Device Performance of HCB-1. a) J-V-L curves, b) EL spectra. c) EQE as a function of luminance. d) CE and PE as a function of luminance.

**Fig. S31** Device Performance of HCB-2. a) J-V-L curves, b) EL spectra. c) EQE as a function of luminance. d) CE and PE as a function of luminance.

**Fig. S32.** Device Performance of HCB-3. a) J-V-L curves, b) EL spectra. c) EQE as a function of luminance. d) CE and PE as a function of luminance.

**Fig. S33** The EL characteristics of a) HCB-1, b) HCB-2, and c) HCB-3 under different voltages and brightness levels.

**Fig. S34** The CIE coordinates of a) HCB-1 (4.4~10.4 V), b) HCB-2 (4.4~10.4 V), and c) HCB-3 (4.7~10.7 V) under different voltages and brightness levels.

**Fig. S35** Transient EL spectra at  $1000 \text{ cd m}^{-2}$  of Device A, Device B, and the DSF Device.

**Fig. S36** EIS measurement of different devices.

**Fig. S37** The operation lifetime of the devices (at an initial luminance of  $100 \text{ cd m}^{-2}$ ). L, luminance of the device during the operational lifetime measurement;  $L_0$ , initial

---

luminance of the device.

**Table S1.** Crystal data and structure refinement for HCB-1.

**Table S2.** Crystal data and structure refinement for HCB-2.

**Table S3.** Crystal data and structure refinement for HCB-3.

**Table S4.** Photophysical characteristics of HCB-1, HCB-2, and HCB-3.

**Table S5.** Photophysical characteristics of HCB-1, HCB-2, and HCB-3 in 100 wt% films.

**Table S6.** OLEDs performance based on HCB-1.

**Table S7.** OLEDs performance based on HCB-2.

**Table S8.** OLEDs performance based on HCB-3.

**Table S9.** EL performances of the reported blue and sky blue TADF-OLEDs by solution process.

**Table S10.** EL performances of the reported blue and sky blue TADF-OLEDs for vacuum-deposited devices.

---

## Synthesis and characterization

*Chemical Synthesis:* All the reagents purchased from commercial sources were used without further purification. All the reactions were performed under nitrogen atmosphere, and the crude products were purified by column chromatography before characterizations and device fabrication.

*Measurements and Characterization:* The chemical structures were determined by  $^1\text{H}$  and  $^{13}\text{C}$  nuclear magnetic resonance (NMR) spectra with Bruker AVANCE III type NMR Spectrometer in  $\text{CDCl}_3$  solution, Matrix-assisted laser desorption/ionization time-of-flight (MALDI-TOF) mass spectrometer, Elemental analysis test using Vario Micro cube elemental analyzer. and single-crystal X-ray diffraction. Ultraviolet–visible (UV-Vis) absorption and photoluminescence (PL) spectra were recorded at room temperature with a Perkin-Elmer Lambda 750 UV-Vis spectrophotometer and a FM-4 type fluorescence spectrophotometer (JY company, French), respectively. The optical bandgap ( $E_g$ ) was determined from the onset of the absorption spectra. Low-temperature phosphorescence spectra were measured with a FLS 920 spectrometer (Einburgh Corporation) in neat film at 77 K. The absolute photoluminescence quantum yields (PLQYs) of the doped and non-doped films were obtained with a C9920-02G type fluorescence spectrophotometer (HAMAMASTU, Japan) with an integrating sphere at room temperature under nitrogen atmosphere.

*Theoretical Calculations:* All the quantum chemical calculations were performed using a DFT method in Gaussian 09 program package. The ground-state geometries were optimized by using a TD-DFT approach at the B3LYP/6-311G(d,p) level. The singlet and triplet excited-state properties were calculated according to the optimized geometries.

*Cyclic voltammetry measurements:* The HOMO and LUMO levels were determined from the Cyclic voltammetry (CV) measurements. CV measurements were conducted on a RST 3100 electrochemical analysis equipment at room temperature with a conventional three electrode configuration, consisting of a platinum disk working electrode, a platinum wire counter electrode, a Ag/AgCl reference electrode, and the supporting electrolyte of tetrabutylammonium hexafluorophosphate (0.1 M). The cyclic

---

voltammograms were obtained at a scanning rate of  $50 \text{ mV s}^{-1}$  with DCM solution.

*Thermal properties:* Thermal gravimetric analysis (TGA) was carried out with an HCT-2 instrument at a heating rate of  $10 \text{ }^\circ\text{C min}^{-1}$  under nitrogen atmosphere.

*Device Fabrication and Measurements:* OLEDs were fabricated on the patterned indium-tin-oxide (ITO)-coated glass substrates with a sheet resistance of  $\sim 15 \text{ } \Omega$  per square. The ITO-coated glass substrates were successively cleaned in an ultrasonic bath with acetone, ethanol, and deionized water, and then dried in an oven at  $110 \text{ }^\circ\text{C}$ . After the UV-ozone treatment for 15 minutes, the ITO-coated glass substrates were transferred into a high-vacuum deposition chamber (base pressure  $\leq 2 \times 10^{-6}$  mbar) for the thermal deposition of organic materials and metal electrodes through a shadow mask. After the film depositions, the fabricated devices were transferred to the nitrogen-filled glovebox for the encapsulation with a glass cap and epoxy glue. Current density-voltage-luminance (J-V-L) characteristics and EL spectra of the devices were measured simultaneously with a source meter (Keithley model 2400) and a luminance meter/spectrometer (PhotoResearch PR670). The CIE 1931 colour coordinates were obtained from the EL spectra. Low-temperature probe and semiconductor parameter analyzer for impedance measurement.

### **General information**

The solvents used and the raw materials for synthesis were from commercial sources and directly used without any further purification.

## Synthesis of materials

### Synthesis of (2r,3s,5s,6s)-4'-(tert-butyl)-3,5-di(9H-carbazol-9-yl)-2,6-bis(3,6-di-tert-butyl-9H-carbazol-9-yl)-[1,1'-biphenyl]-4-carbonitrile (HCB-1).

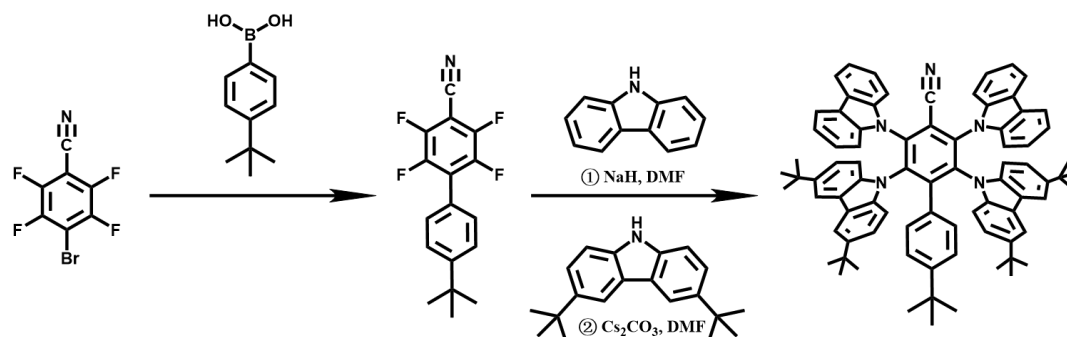

**Scheme S1.** The synthetic route of HCB-1.

**Step (1):** Compound 4-bromo-2,3,5,6-tetrafluorobenzonitrile (1.0 g, 3.9 mmol) and (4-(tert-butyl)phenyl)boronic acid (0.85 g, 4.7 mmol) were dissolved in 40 mL 1,4-Dioxane. Then Pd[P(Ph)<sub>3</sub>]<sub>4</sub> (5% equi) and K<sub>3</sub>CO<sub>3</sub> (1.1 g, 7.9 mmol) dissolved in water (3.7 ml) were added in a nitrogen atmosphere. After the solution was heated at 105 °C for 18 hours, the reaction mixture was cooled to room temperature. The crude product was further purified by column chromatography on silica gel (DCM: hexane=1:4) to give 0.92 g (yield: 77%) of 4'-(tert-butyl)-2,3,5,6-tetrafluoro-[1,1'-biphenyl]-4-carbonitrile as a white powder.

**Step (2):** Carbazole (1 g, 5.7 mmol) and NaH (0.25 g, 10.0 mmol) were stirred for 30 min in N, N- Dimethylformamide (25 mL) in three-neck bottle under nitrogen at 0 °C. Then compound 4'-(tert-butyl)-2,3,5,6-tetrafluoro-[1,1'-biphenyl]-4-carbonitrile (0.8 g 2.6 mmol) which dissolved in 35 mL dry N, N- Dimethylformamide was injected into the bottle and the reaction mixture was stirred 24 h at room temperature. Then, 3,6-di-tert-butyl-9H-carbazole (1.64 g, 5.8 mmol), Cs<sub>2</sub>CO<sub>3</sub> (2.6 g, 7.8 mmol) and dry N, N- Dimethylformamide (30 ml) were added into the mixture. After the reaction mixture was stirred under N<sub>2</sub> atmosphere at 150 °C for 24 h. The mixture solution was poured into 250 mL water, and the green precipitates was collected by filtration under a reduced pressure. The crude product was further purified by column chromatography on silica gel (DCM: hexane=1:4) to give 1.18 g (yield: 53%) of (2r,3s,5s,6s)-4'-(tert-butyl)-

**3,5-di(9H-carbazol-9-yl)-2,6-bis(3,6-di-tert-butyl-9H-carbazol-9-yl)-[1,1'-biphenyl]-4-carbonitrile** as a green powder.  $^1\text{H}$  NMR (400 MHz,  $\text{CDCl}_3$ )  $\delta$  7.69 – 7.64 (m, 4H), 7.52 (t,  $J = 1.8$  Hz, 4H), 7.15 (dt,  $J = 7.6, 1.7$  Hz, 4H), 7.05 (ddt,  $J = 6.8, 4.3, 1.4$  Hz, 8H), 6.92 (dt,  $J = 8.6, 1.8$  Hz, 4H), 6.84 (dd,  $J = 8.6, 1.8$  Hz, 4H), 6.78 (dd,  $J = 8.5, 1.6$  Hz, 2H), 6.54 – 6.50 (m, 2H), 1.31 (d,  $J = 1.5$  Hz, 36H), 0.78 (d,  $J = 1.3$  Hz, 9H).  $^{13}\text{C}$  NMR (101 MHz,  $\text{CDCl}_3$ )  $\delta$  151.30, 151.01, 142.85, 140.61, 139.48, 137.75, 137.55, 130.00, 127.75, 125.06, 124.43, 124.03, 123.53, 122.31, 120.61, 119.80, 117.14, 115.35, 112.91, 110.40, 109.68, 34.44, 34.11, 31.84, 30.67. MALDI-TOF-MS ( $m/z$ ) of  $\text{C}_{81}\text{H}_{77}\text{N}_5$  for  $[\text{M}]^+$ : calcd. 1120.202; found, 1120.542.

**Synthesis of (2r,3s,5s,6s)-3,5-di(9H-carbazol-9-yl)-2,6-bis(3,6-di-tert-butyl-9H-carbazol-9-yl)-[1,1':4',1''-terphenyl]-4-carbonitrile (HCB-2).**

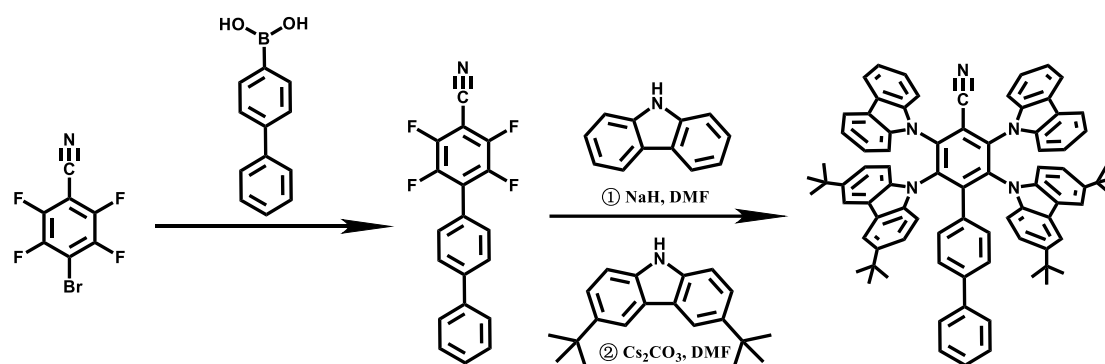

**Scheme S2.** Synthesis of HCB-2.

**Step (1):** Compound 4-bromo-2,3,5,6-tetrafluorobenzonitrile (1.0 g, 3.9 mmol) and [1,1'-biphenyl]-4-ylboronic acid (0.93 g, 4.7 mmol) acid were dissolved in 40 mL 1,4-Dioxane. Then  $\text{Pd}[\text{P}(\text{Ph})_3]_4$  (5% equi) and  $\text{K}_3\text{CO}_3$  (1.1 g, 7.9 mmol) dissolved in water (3.7 ml) were added in a nitrogen atmosphere After the solution was heated at 105 °C for 18 hours, the reaction mixture was cooled to room temperature. The crude product was further purified by column chromatography on silica gel (DCM: hexane=1:4) to give 1.03 g (yield: 78%) of 2,3,5,6-tetrafluoro-[1,1':4',1''-terphenyl]-4-carbonitrile as a white powder.

**Step (2):** Carbazole (1.16 g, 6.9 mmol) and NaH (0.27 g, 11.5 mmol) were stirred for 30 min in N, N- Dimethylformamide (25 mL) in three-neck bottle under nitrogen at



0 °C. Then compound 2,3,5,6-tetrafluoro-[1,1':4',1''-terphenyl]-4-carbonitrile (0.9 g 2.7 mmol) which dissolved in 35 mL dry N, N-Dimethylformamide was injected into the bottle and the reaction mixture was stirred 24 h at room temperature. Then, 3,6-di-tert-butyl-9H-carbazole (2.0 g, 7.1 mmol), Cs<sub>2</sub>CO<sub>3</sub> (3.2 g, 9.8 mmol) and dry N, N-Dimethylformamide (30 ml) were added into the mixture. After the reaction mixture was stirred under N<sub>2</sub> atmosphere at 150 °C for 24 h. The mixture solution was poured into 250 mL water, and the green precipitates was collected by filtration under a reduced pressure. The crude product was further purified by column chromatography on silica gel (DCM: hexane=1:4) to give 1.21 g (yield: 51%) of **(2r,3s,5s,6s)-3,5-di(9H-carbazol-9-yl)-2,6-bis(3,6-di-tert-butyl-9H-carbazol-9-yl)-[1,1':4',1''-terphenyl]-4-carbonitrile** as a green powder. <sup>1</sup>H NMR (400 MHz, CDCl<sub>3</sub>) δ 7.63 (dt, J = 7.0, 1.7 Hz, 4H), 7.48 (d, J = 1.8 Hz, 4H), 7.11 (ddt, J = 9.5, 6.3, 1.7 Hz, 7H), 7.07 – 6.98 (m, 10H), 6.97 – 6.89 (m, 6H), 6.85 (dd, J = 8.6, 1.6 Hz, 4H), 6.79 – 6.74 (m, 2H), 1.27 (s, 36H). <sup>13</sup>C NMR (101 MHz, CDCl<sub>3</sub>) δ 150.85, 143.05, 140.83, 139.93, 139.50, 137.84, 137.71, 132.09, 128.47, 128.35, 127.21, 126.67, 126.34, 125.08, 124.05, 123.63, 122.42, 120.63, 119.81, 115.57, 110.32, 109.59, 34.44, 31.81. MALDI-TOF-MS (m/z) of C<sub>83</sub>H<sub>73</sub>N<sub>5</sub> for [M]<sup>+</sup>: calcd. 1140.095; found, 1140.532.

**Synthesis of (2r,3s,5s,6s)-3,5-di(9H-carbazol-9-yl)-2,6-bis(3,6-di-tert-butyl-9H-carbazol-9-yl)-5'-phenyl-[1,1':3',1''-terphenyl]-4-carbonitrile (HCB-3).**

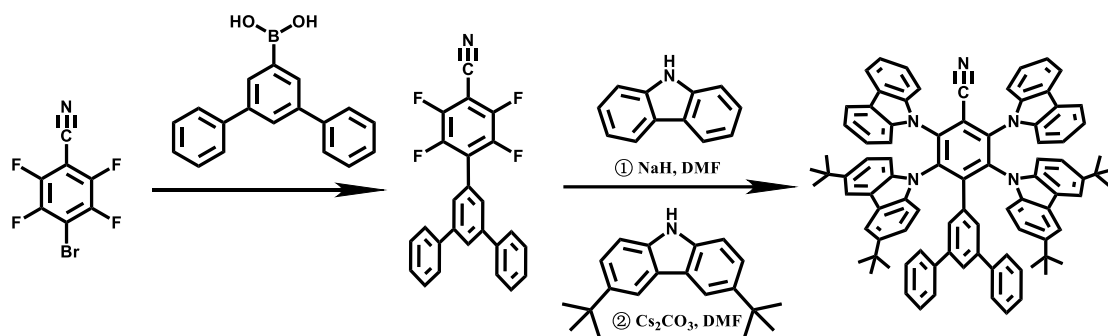

**Scheme S3.** Synthesis of HCB-3.

**Step (1):** Compound 4-bromo-2,3,5,6-tetrafluorobenzonitrile (1.0 g, 3.9 mmol) and [1,1':3',1''-terphenyl]-5'-ylboronic acid (1.28 g, 4.7 mmol) were dissolved in 40 mL 1,4-Dioxane. Then Pd[P(Ph)<sub>3</sub>]<sub>4</sub> (5% equi) and K<sub>3</sub>CO<sub>3</sub> (1.1 g, 7.9 mmol) dissolved in water

---

(3.7 ml) were added in a nitrogen atmosphere. After the solution was heated at 105 °C for 18 hours, the reaction mixture was cooled to room temperature. The crude product was further purified by column chromatography on silica gel (DCM: hexane=1:4) to give 1.23 g (yield: 74%) of 2,3,5,6-tetrafluoro-5'-phenyl-[1,1':3',1''-terphenyl]-4-carbonitrile compound with methane (1:1) as a white powder.

**Step (2):** Carbazole (1.1 g, 6.4 mmol) and NaH (0.26 g, 11.0 mmol) were stirred for 30 min in N, N- Dimethylformamide (25 mL) in three-neck bottle under nitrogen at 0 °C .Then compound 2,3,5,6-tetrafluoro-5'-phenyl-[1,1':3',1''-terphenyl]-4-carbonitrile compound with methane (1:1) (1.1 g 2.6 mmol) which dissolved in 35 mL dry N, N-Dimethylformamide was injected into the bottle and the reaction mixture was stirred 24 h at room temperature. Then, 3,6-di-tert-butyl-9H-carbazole (1.44 g, 5.1 mmol), Cs<sub>2</sub>CO<sub>3</sub> (2.2 g, 6.8 mmol) and dry N, N-Dimethylformamide (30 ml) were added into the mixture. After the reaction mixture was stirred under N<sub>2</sub> atmosphere at 150 °C for 24 h. The mixture solution was poured into 250 mL water, and the green precipitates was collected by filtration under a reduced pressure. The crude product was further purified by column chromatography on silica gel (DCM: hexane=1:4) to give 0.93 g (yield: 47%) of **(2r,3s,5s,6s)-3,5-di(9H-carbazol-9-yl)-2,6-bis(3,6-di-tert-butyl-9H-carbazol-9-yl)-5'-phenyl-[1,1':3',1''-terphenyl]-4-carbonitrile** as a green powder. <sup>1</sup>H NMR (400 MHz, CDCl<sub>3</sub>) δ 7.75 (dd, J = 7.0, 1.6 Hz, 4H), 7.57 (d, J = 1.8 Hz, 4H), 7.30 (d, J = 7.7 Hz, 4H), 7.18 – 7.08 (m, 10H), 6.99 (dt, J = 19.2, 8.2 Hz, 12H), 6.83 (dd, J = 6.8, 1.6 Hz, 3H), 6.36 – 6.27 (m, 4H), 1.30 (s, 36H). <sup>13</sup>C NMR (101 MHz, CDCl<sub>3</sub>) δ 151.70, 143.05, 141.73, 140.76, 140.34, 139.96, 138.09, 137.84, 133.18, 128.22, 126.92, 126.82, 125.69, 125.43, 124.24, 123.44, 122.79, 120.85, 120.03, 115.60, 110.30, 109.65, 34.48, 31.8. MALDI-TOF-MS (m/z) of C<sub>89</sub>H<sub>77</sub>N<sub>5</sub> for [M]<sup>+</sup>: calcd. 1216.578; found, 1216.630.

# $^1\text{H}$ and $^{13}\text{C}$ NMR of the products

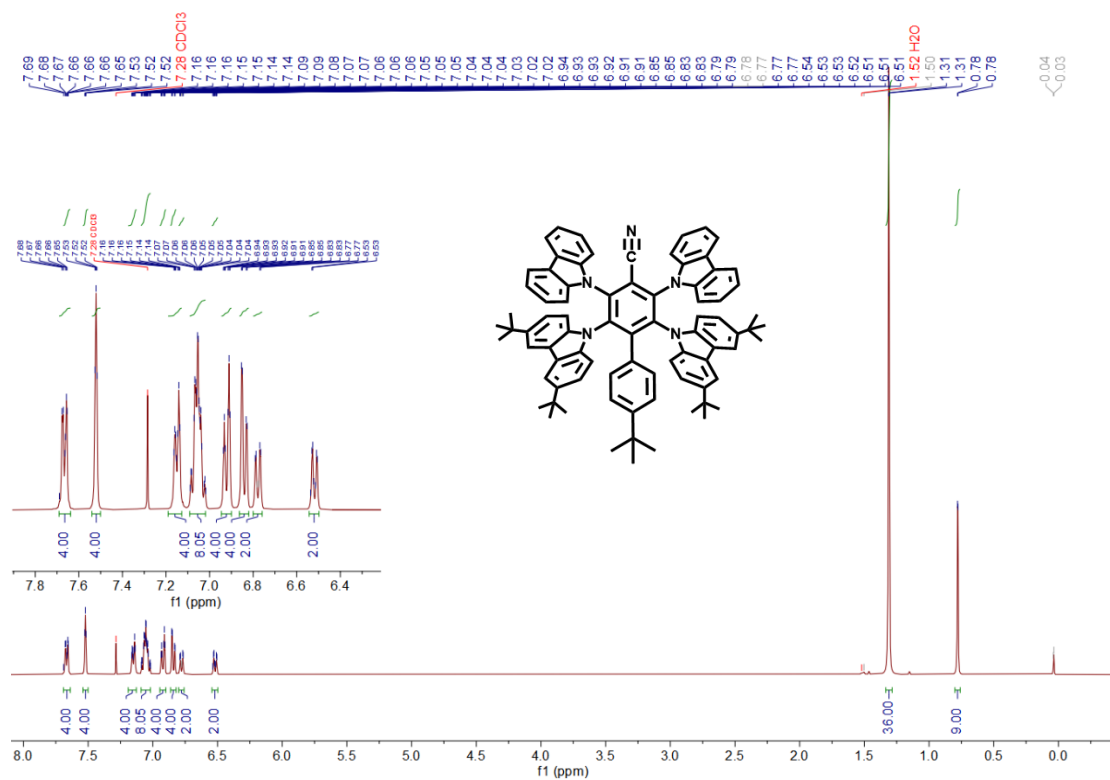

Fig. S1  $^1\text{H}$  NMR spectrum of HCB-1.

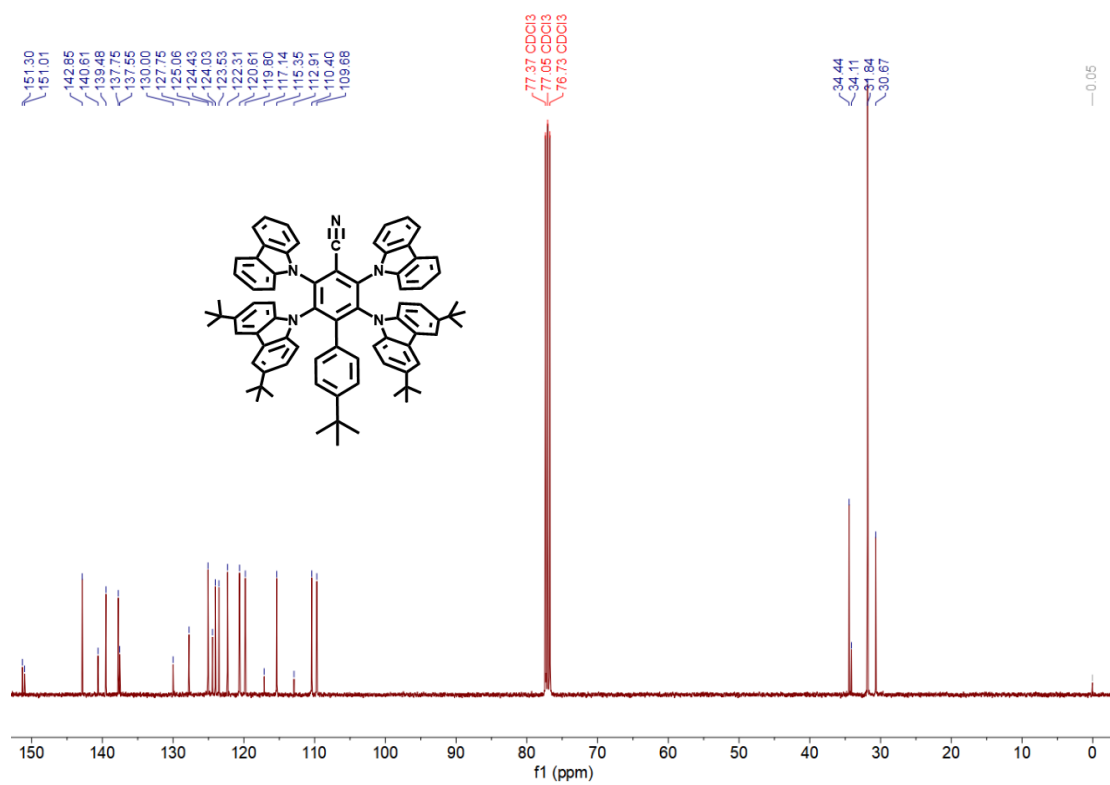

**Fig. S2**  $^{13}\text{C}$  NMR spectrum of HCB-1.

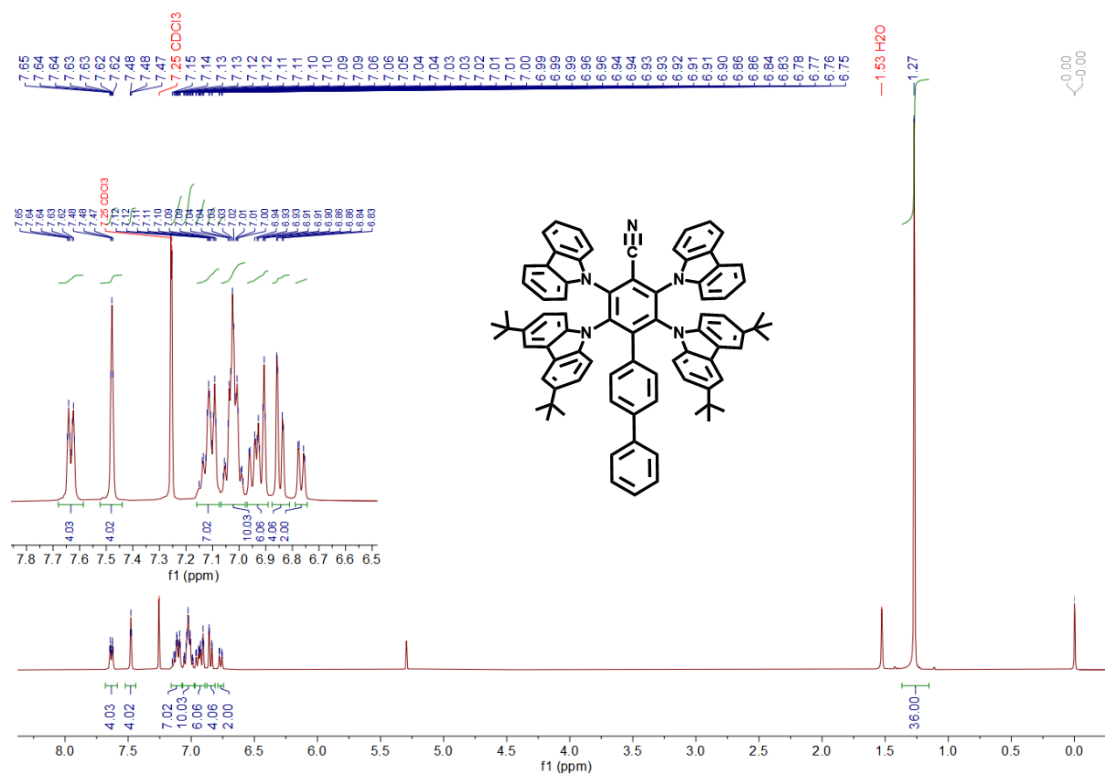

**Fig. S3**  $^1\text{H}$  NMR spectrum of HCB-2.

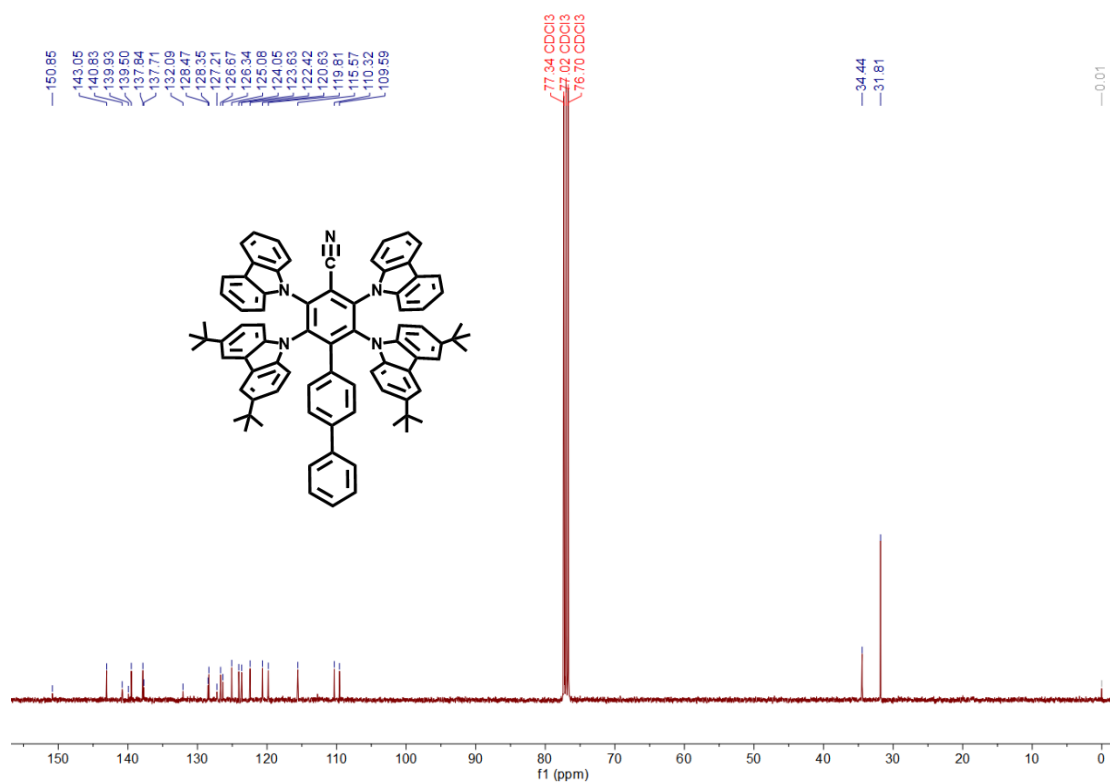

**Fig. S4**  $^{13}\text{C}$  NMR spectrum of HCB-2.



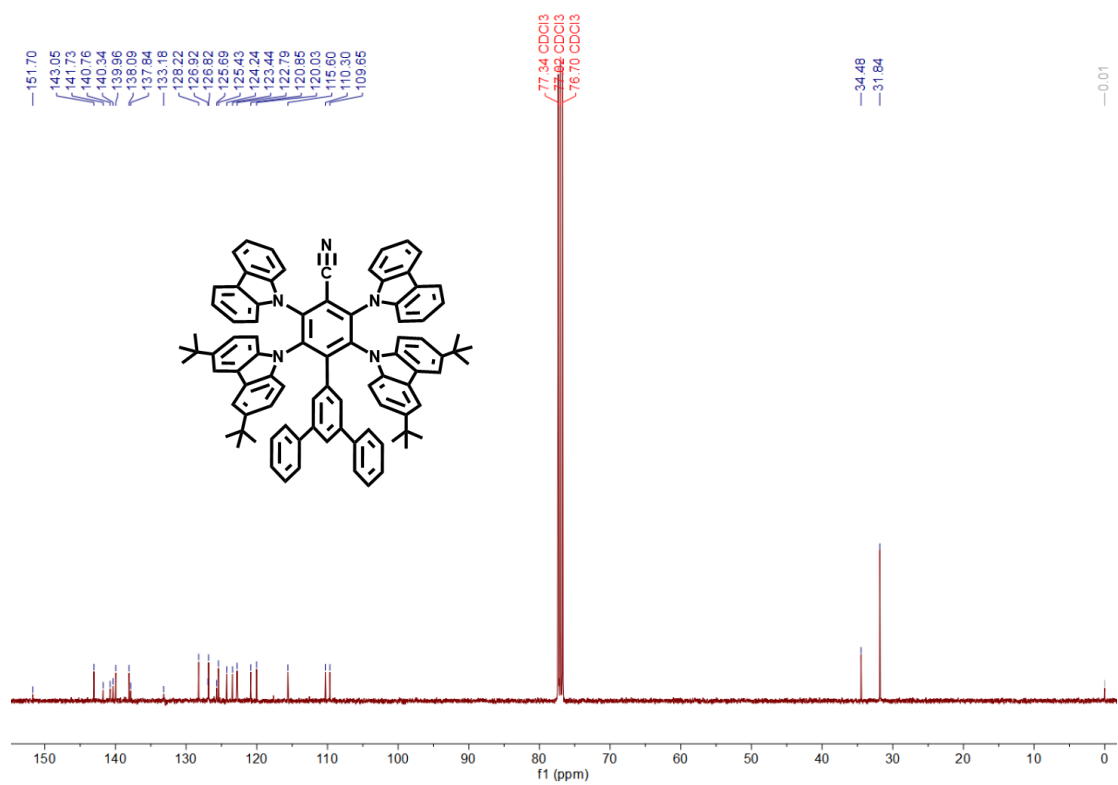

**Fig. S6** <sup>13</sup>C NMR spectrum of HCB-3.



## MALDI-TOF of the products

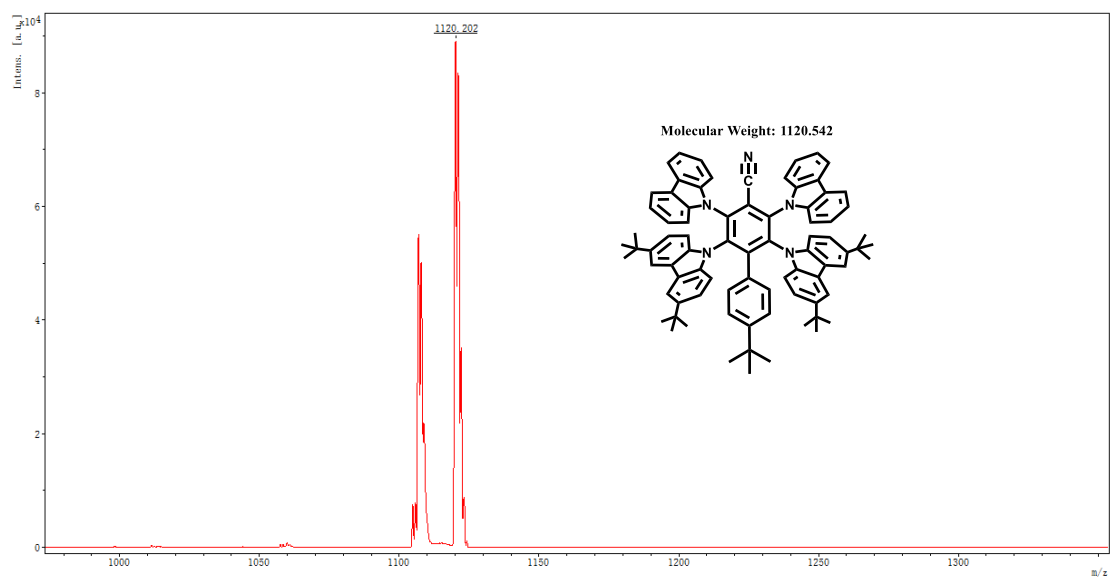

**Fig. S7** TOF-MS spectrum of HCB-1.

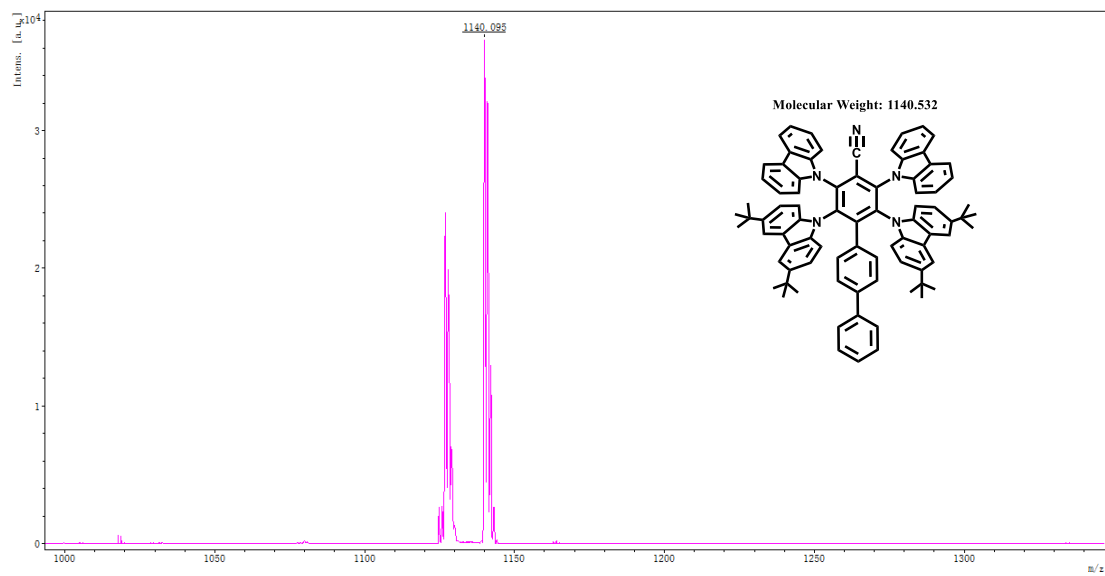

**Fig. S8** TOF-MS spectrum of HCB-2.

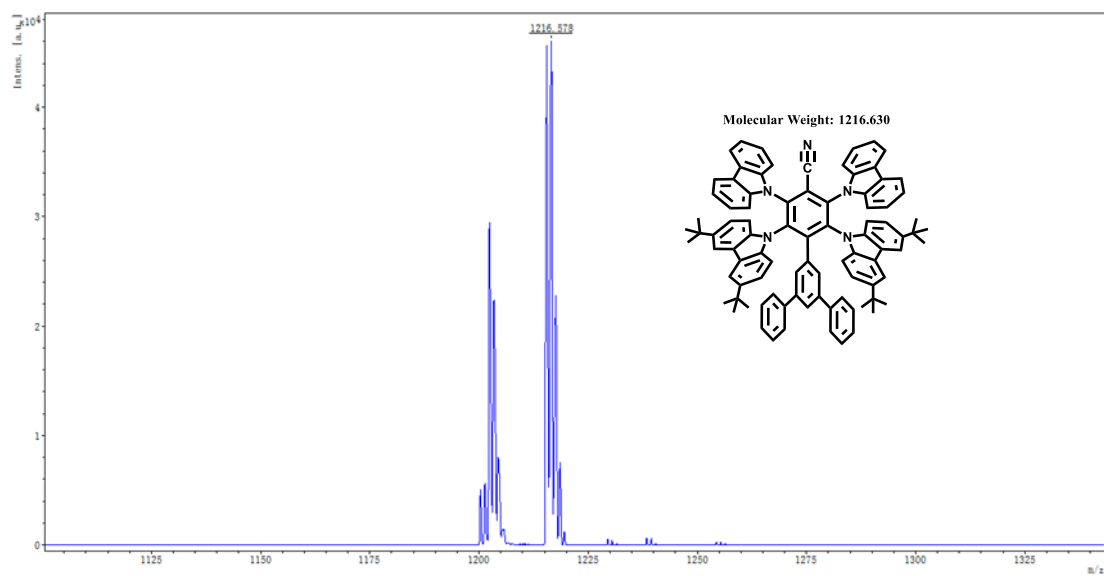

**Fig. S9** TOF-MS spectrum of HCB-3.

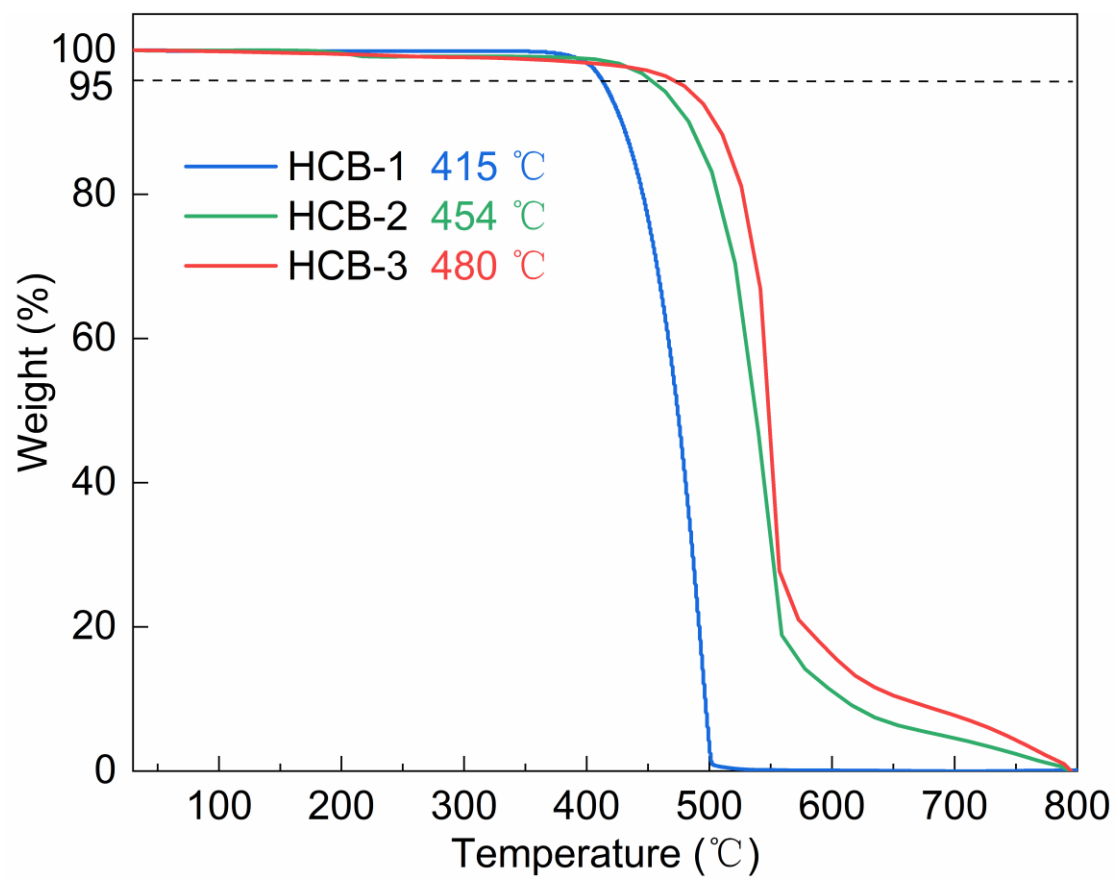

**Fig. S10** TGA curves of HCB-1, HCB-2, and HCB-3.

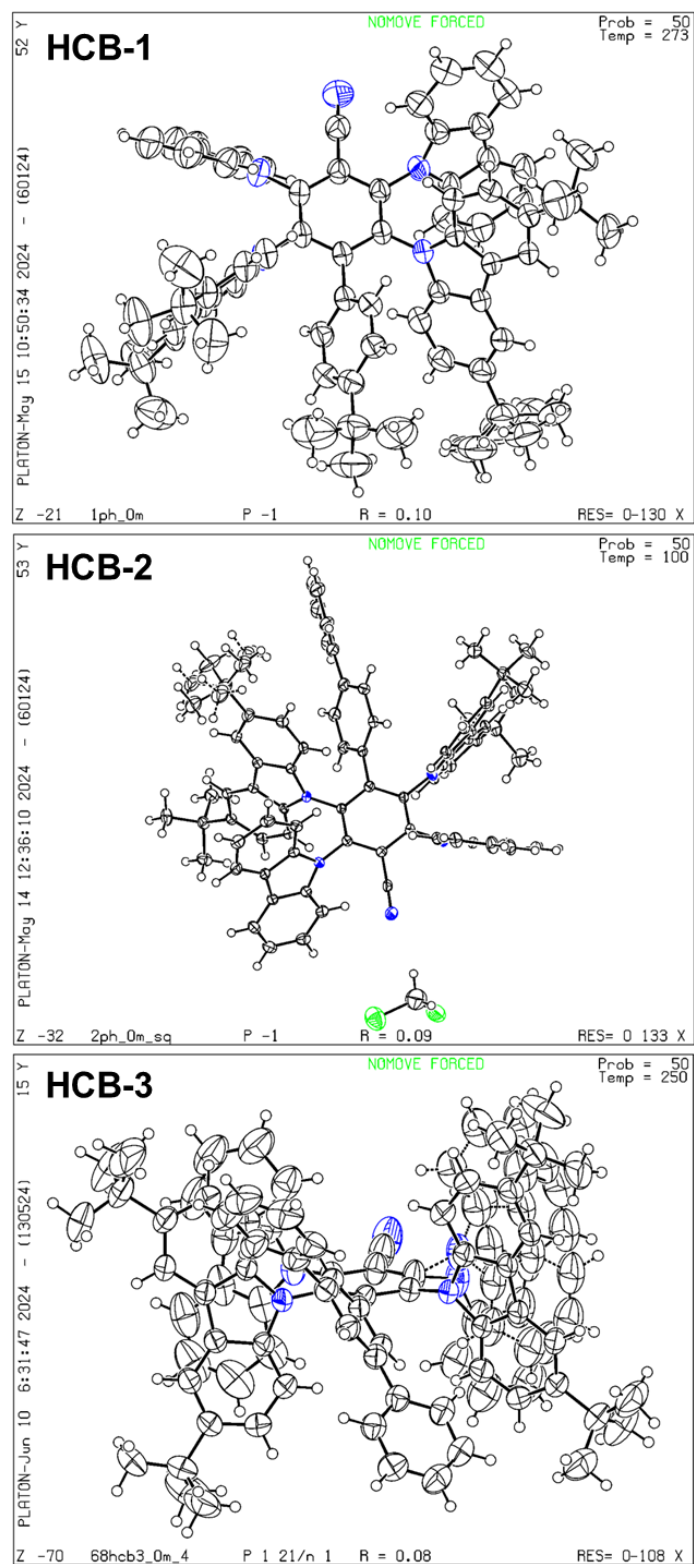

**Fig. S11** Ellipsoid plot of HCB-1, HCB-2, and HCB-3 obtained by single crystal diffraction.

**Table S1.** Crystal data and structure refinement for HCB-1.

| Compound                                    | HCB-1                                                          |
|---------------------------------------------|----------------------------------------------------------------|
| Empirical formula                           | C <sub>81</sub> H <sub>77</sub> N <sub>5</sub>                 |
| CCDC number                                 | 2364901                                                        |
| Temperature/K                               | 273                                                            |
| Crystal system                              | triclinic                                                      |
| Space group                                 | P-1                                                            |
| a/Å                                         | 11.898(4)                                                      |
| b/Å                                         | 13.679(5)                                                      |
| c/Å                                         | 22.573(8)                                                      |
| $\alpha$ /°                                 | 73.668(11)                                                     |
| $\beta$ /°                                  | 79.199(10)                                                     |
| $\gamma$ /°                                 | 71.603(11)                                                     |
| Volume/Å <sup>3</sup>                       | 3326(2)                                                        |
| Z                                           | 2                                                              |
| $\rho_{\text{calc}}/\text{cm}^3$            | 1.119                                                          |
| $\mu/\text{mm}^{-1}$                        | 0.065                                                          |
| F(000)                                      | 1196                                                           |
| Crystal size/mm <sup>3</sup>                | 0.15 × 0.08 × 0.05                                             |
| Radiation                                   | MoK $\alpha$ ( $\lambda$ = 0.71073)                            |
| 2 $\theta$ range for data collection/°      | 3.782 to 52.844                                                |
| Index ranges                                | -14 ≤ h ≤ 14, -16 ≤ k ≤ 17, -28 ≤ l ≤ 28                       |
| Reflections collected                       | 36017                                                          |
| Independent reflections                     | 13353 [R <sub>int</sub> = 0.0759, R <sub>sigma</sub> = 0.1062] |
| Data/restraints/parameters                  | 13353/1770/820                                                 |
| Goodness-of-fit on F <sup>2</sup>           | 1.174                                                          |
| Final R indexes [I ≥ 2 $\sigma$ (I)]        | R <sub>1</sub> = 0.0961, wR <sub>2</sub> = 0.2262              |
| Final R indexes [all data]                  | R <sub>1</sub> = 0.2013, wR <sub>2</sub> = 0.2804              |
| Largest diff. peak/hole / e Å <sup>-3</sup> | 0.65/-0.49                                                     |

**Table S2.** Crystal data and structure refinement for HCB-2.

| Compound                                    | HCB-2                                                          |
|---------------------------------------------|----------------------------------------------------------------|
| Empirical formula                           | C <sub>84</sub> H <sub>75</sub> Cl <sub>2</sub> N <sub>5</sub> |
| CCDC number                                 | 2364902                                                        |
| Temperature/K                               | 100                                                            |
| Crystal system                              | triclinic                                                      |
| Space group                                 | P-1                                                            |
| a/Å                                         | 11.9195(2)                                                     |
| b/Å                                         | 14.7278(3)                                                     |
| c/Å                                         | 21.6227(4)                                                     |
| $\alpha$ /°                                 | 84.2410(10)                                                    |
| $\beta$ /°                                  | 78.2020(10)                                                    |
| $\gamma$ /°                                 | 69.5210(10)                                                    |
| Volume/Å <sup>3</sup>                       | 3479.09(11)                                                    |
| Z                                           | 2                                                              |
| $\rho_{\text{calc}}/\text{cm}^3$            | 1.17                                                           |
| $\mu/\text{mm}^{-1}$                        | 1.204                                                          |
| F(000)                                      | 1296                                                           |
| Crystal size/mm <sup>3</sup>                | 0.15 × 0.08 × 0.05                                             |
| Radiation                                   | CuK $\alpha$ ( $\lambda$ = 1.54178)                            |
| 2 $\theta$ range for data collection/°      | 4.176 to 127.83                                                |
| Index ranges                                | -13 ≤ h ≤ 13, -17 ≤ k ≤ 17, -25 ≤ l ≤ 24                       |
| Reflections collected                       | 22352                                                          |
| Independent reflections                     | 11303 [R <sub>int</sub> = 0.0606, R <sub>sigma</sub> = 0.0765] |
| Data/restraints/parameters                  | 11303/971/862                                                  |
| Goodness-of-fit on F <sup>2</sup>           | 1.045                                                          |
| Final R indexes [I ≥ 2 $\sigma$ (I)]        | R <sub>1</sub> = 0.0867, wR <sub>2</sub> = 0.2242              |
| Final R indexes [all data]                  | R <sub>1</sub> = 0.1025, wR <sub>2</sub> = 0.2406              |
| Largest diff. peak/hole / e Å <sup>-3</sup> | 1.18/-1.37                                                     |

**Table S3** Crystal data and structure refinement for HCB-3.

| Compound                                    | HCB-3                                                     |
|---------------------------------------------|-----------------------------------------------------------|
| Empirical formula                           | C <sub>89</sub> H <sub>77</sub> N <sub>5</sub>            |
| CCDC number                                 | 2364903                                                   |
| Temperature/K                               | 250                                                       |
| Crystal system                              | monoclinic                                                |
| Space group                                 | P21/n                                                     |
| a/Å                                         | 11.6574(4)                                                |
| b/Å                                         | 21.0626(7)                                                |
| c/Å                                         | 30.0359(9)                                                |
| $\alpha$ /°                                 | 90                                                        |
| $\beta$ /°                                  | 94.411(2)                                                 |
| $\gamma$ /°                                 | 90                                                        |
| Volume/Å <sup>3</sup>                       | 7353.0(4)                                                 |
| Z                                           | 4                                                         |
| $\rho_{\text{calc}}/\text{cm}^3$            | 1.099                                                     |
| $\mu/\text{mm}^{-1}$                        | 0.485                                                     |
| F(000)                                      | 2584                                                      |
| Crystal size/mm <sup>3</sup>                | 0.15 × 0.09 × 0.08                                        |
| Radiation                                   | CuK $\alpha$ ( $\lambda$ = 1.54178)                       |
| 2 $\theta$ range for data collection/°      | 5.13 to 127.844                                           |
| Index ranges                                | -13 ≤ h ≤ 13, 0 ≤ k ≤ 24, 0 ≤ l ≤ 34                      |
| Reflections collected                       | 11809                                                     |
| Independent reflections                     | 11809 [R <sub>int</sub> = ?, R <sub>sigma</sub> = 0.0753] |
| Data/restraints/parameters                  | 11809/1341/969                                            |
| Goodness-of-fit on F <sup>2</sup>           | 1.056                                                     |
| Final R indexes [I >= 2 $\sigma$ (I)]       | R <sub>1</sub> = 0.0808, wR <sub>2</sub> = 0.2241         |
| Final R indexes [all data]                  | R <sub>1</sub> = 0.1146, wR <sub>2</sub> = 0.2690         |
| Largest diff. peak/hole / e Å <sup>-3</sup> | 0.42/-0.26                                                |



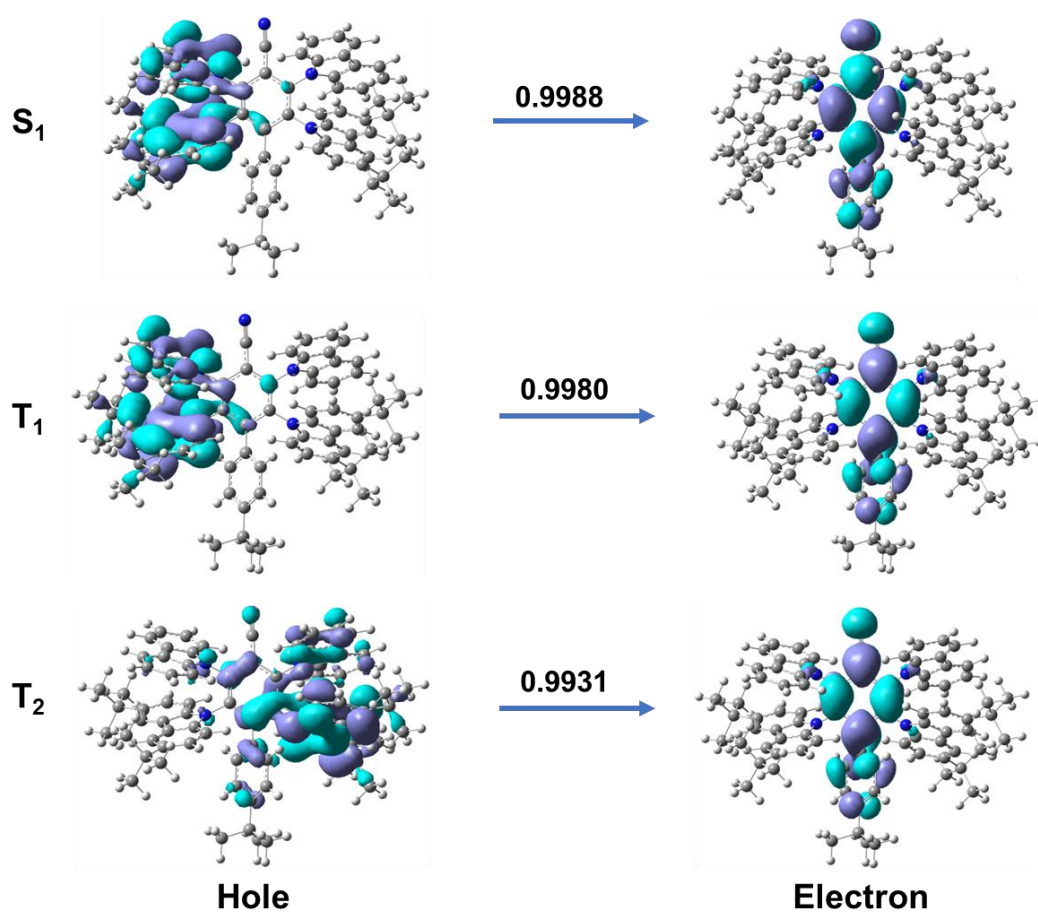

**Fig. S12** The NTO diagram of HCB-1.

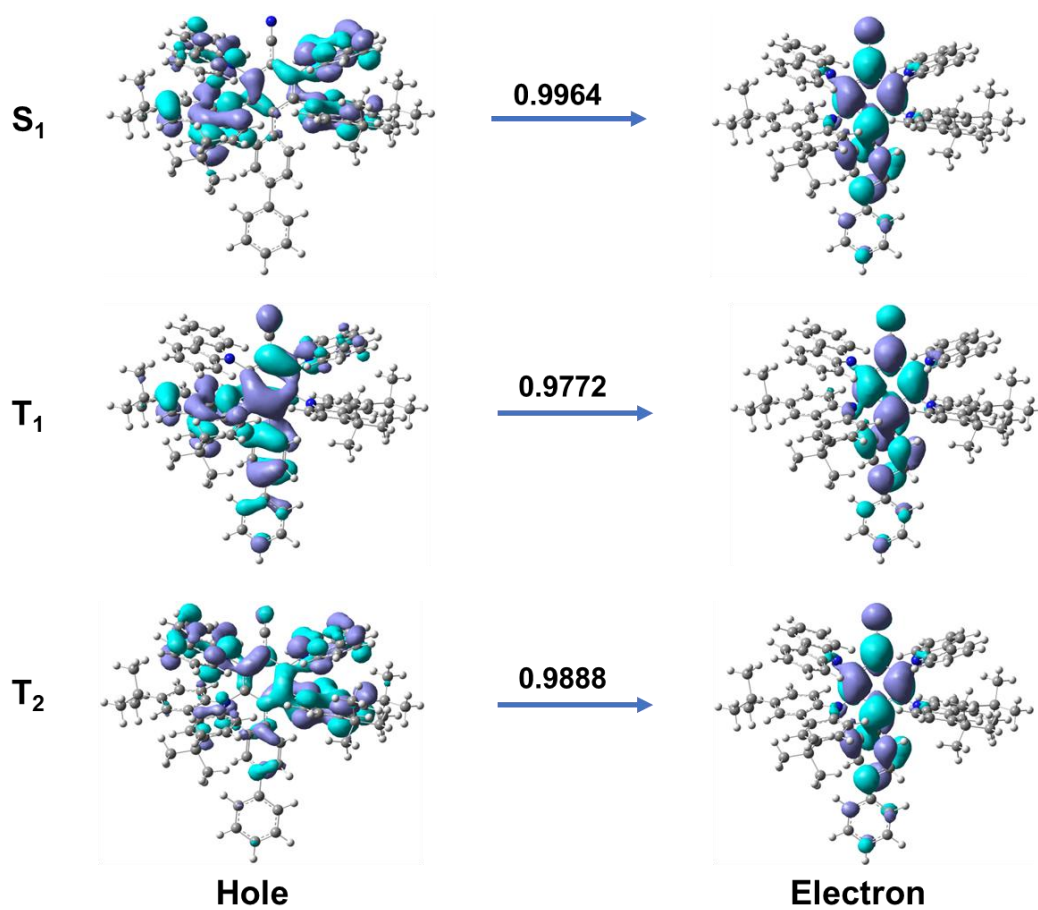

Fig. S13 The NTO diagram of HCB-2.

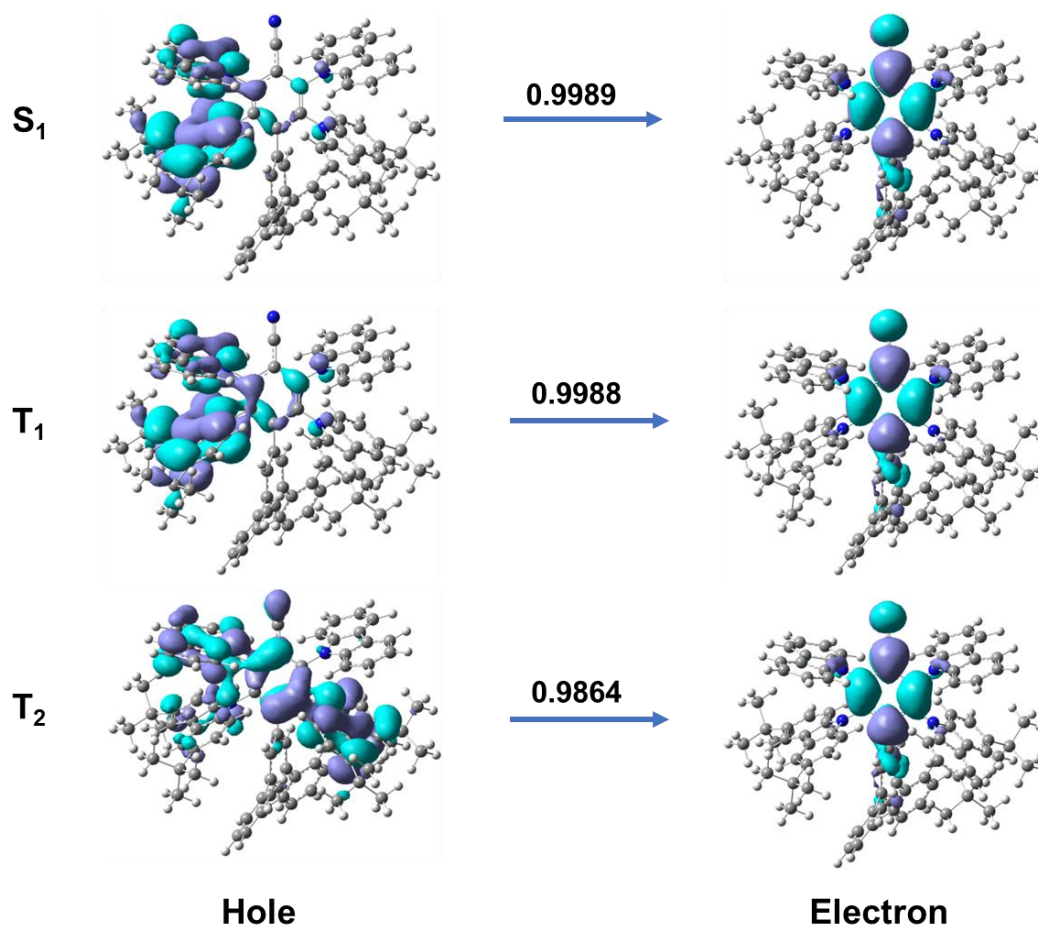

Fig. S14 The NTO diagram of HCB-3.

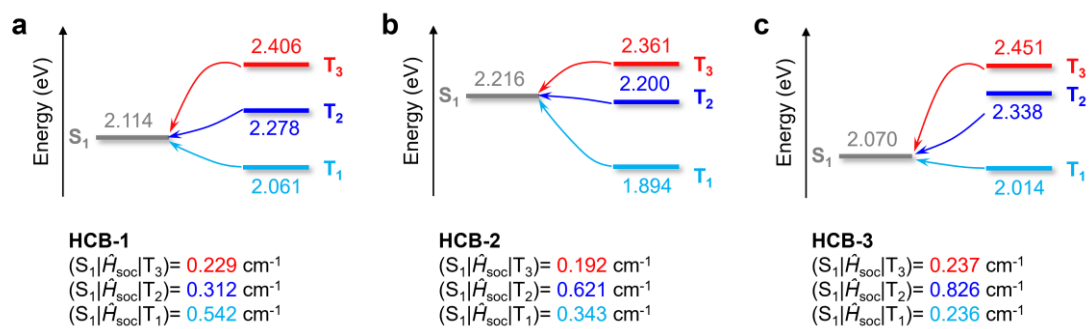

**Fig. S15** The calculated energies and SOC constants between  $S_1$  and  $T_{1-3}$  states for all TADF emitters.

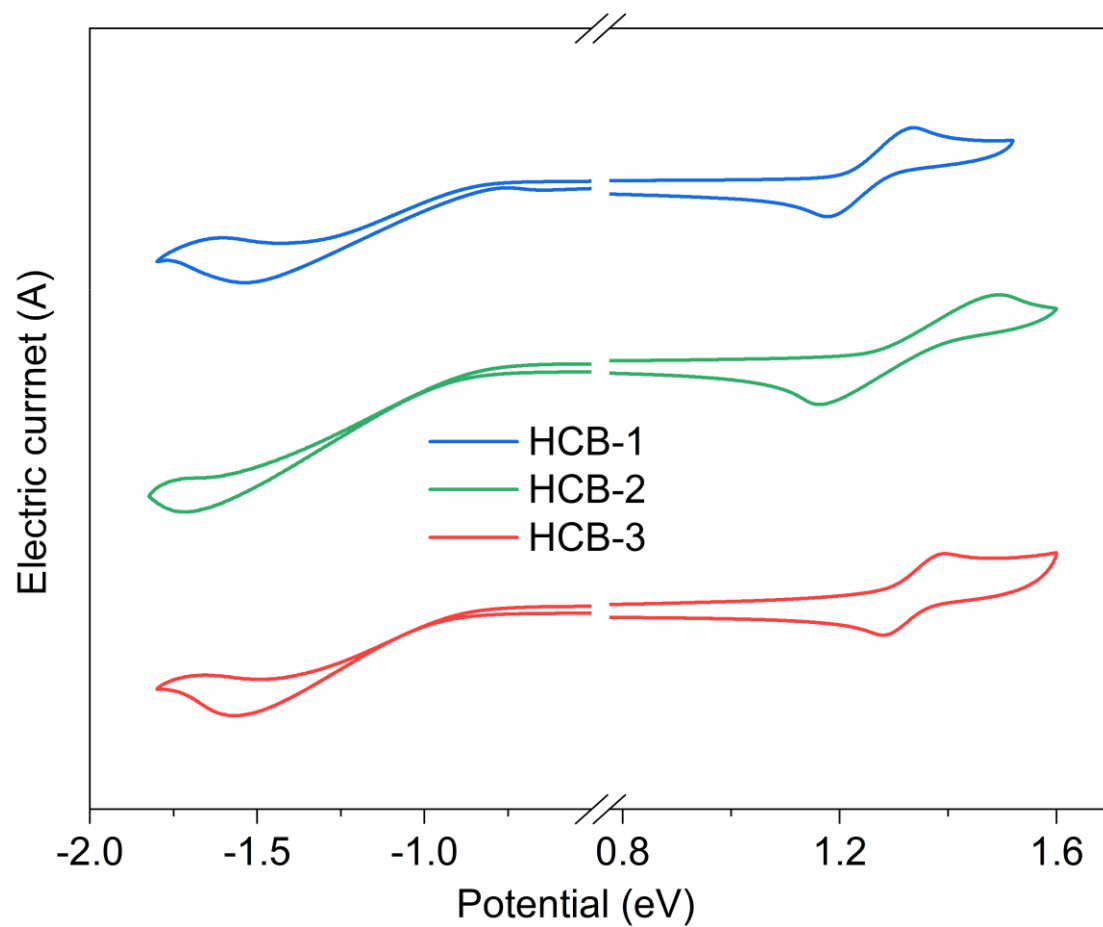

**Fig. S16** CV diagrams of HCB-1, HCB-2, and HCB-3.

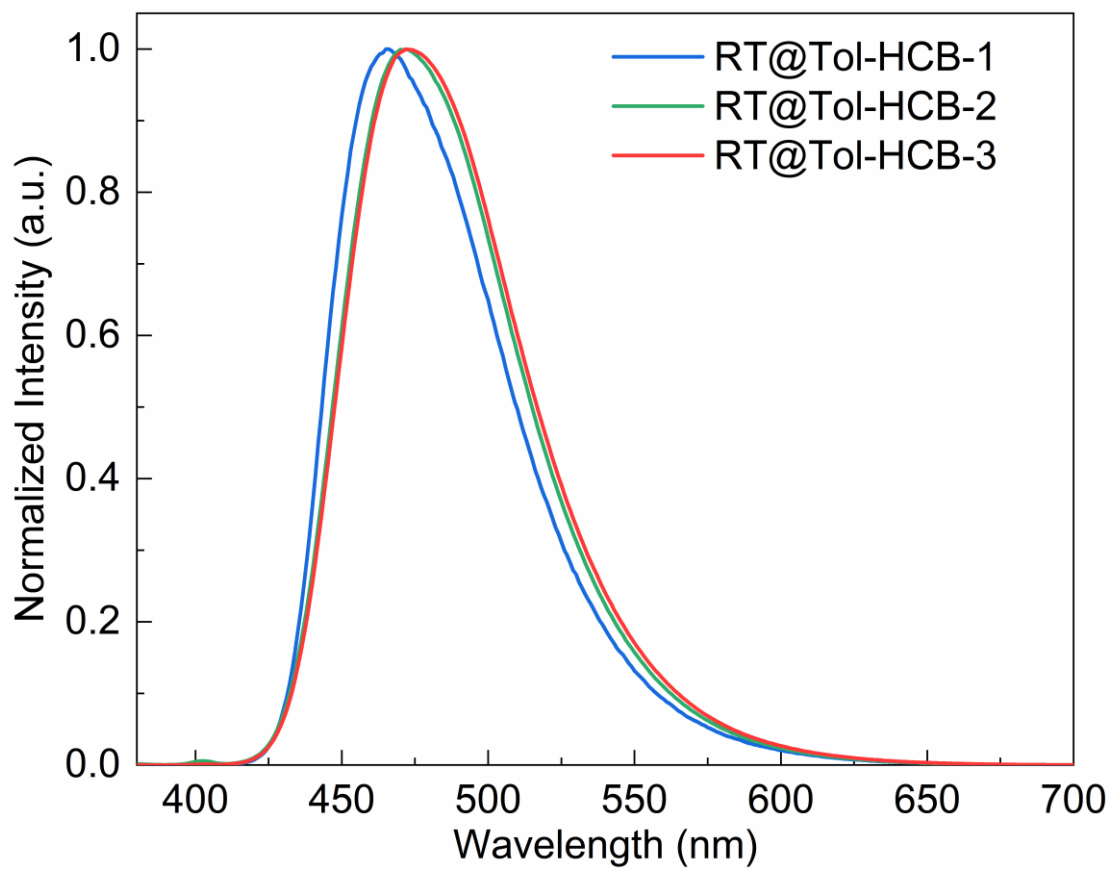

**Fig. S17** PL spectra of HCB-1, HCB-2, and HCB-3 measured in toluene at room-temperature (RT).

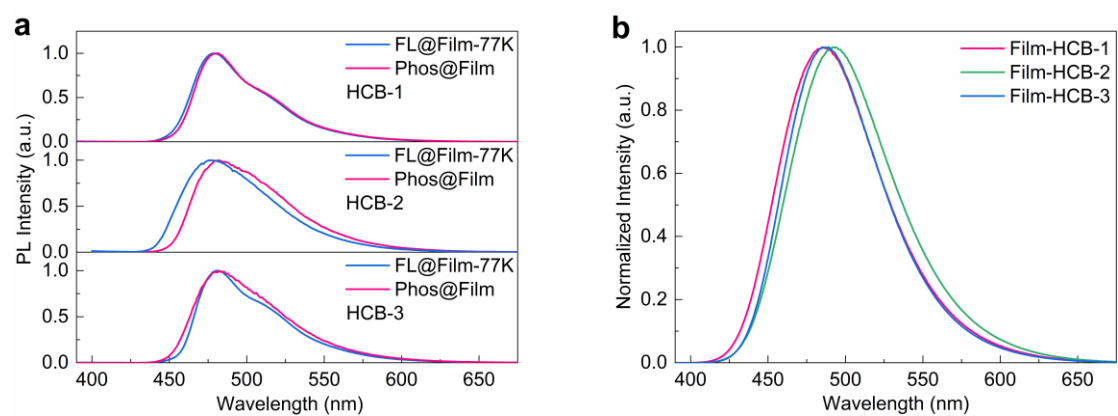

**Fig. S18** a) Phosphorescence and PL spectra of HCB-1, HCB-2, and HCB-3 measured in pure film at 77 K. b) PL spectra of HCB-1, HCB-2, and HCB-3 measured in 100 wt% film at RT.

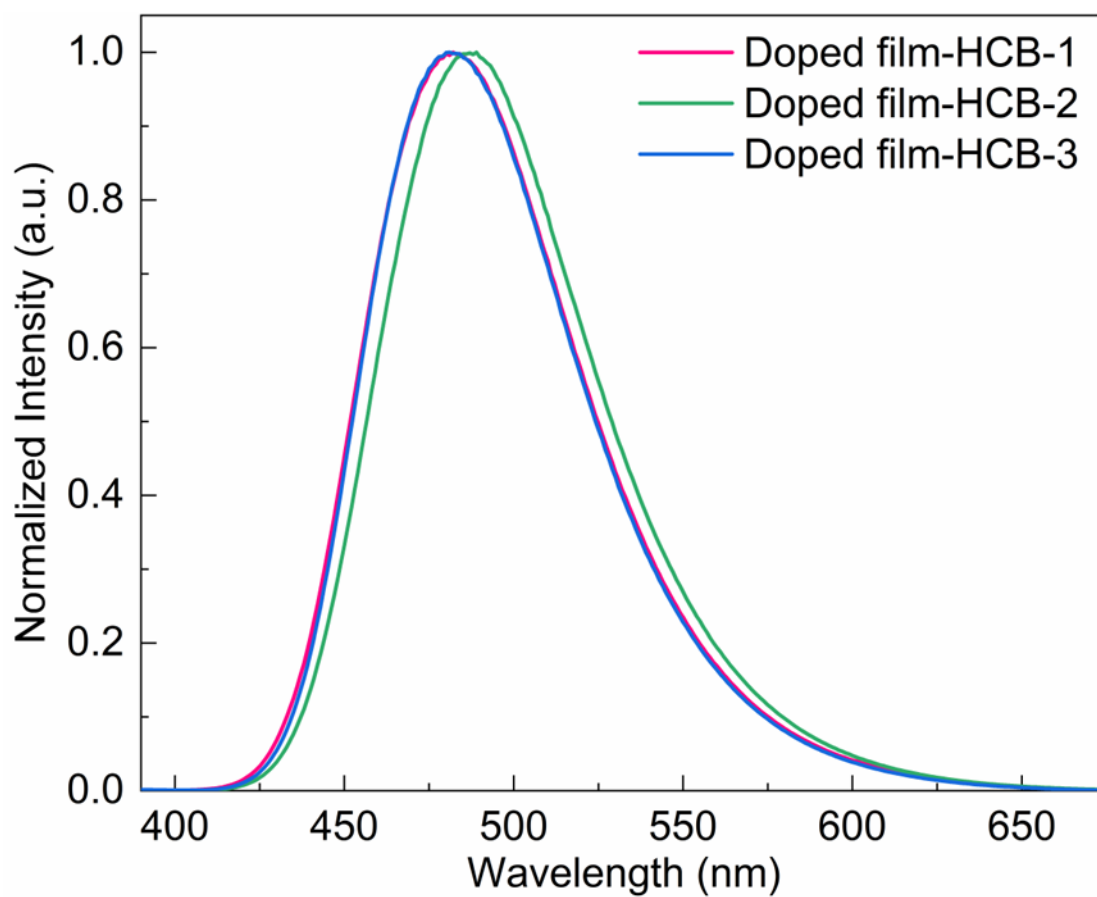

**Fig. S19** PL spectra of HCB-1, HCB-2, and HCB-3 measured in 20 wt% film at room-temperature (RT).



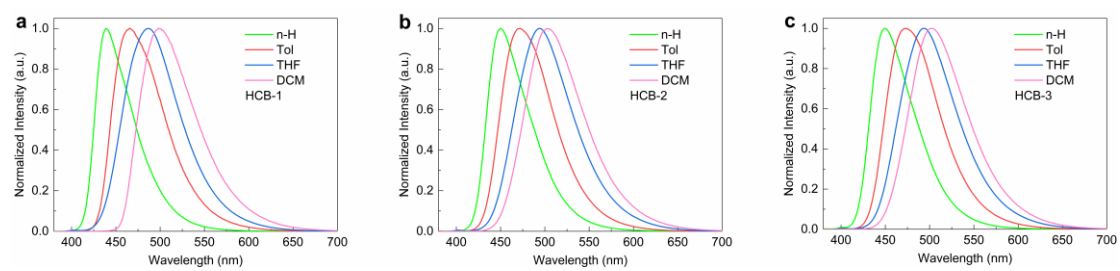

**Fig. S20** PL spectra of a) HCB-1, b) HCB-2, and c) HCB-3 in various solvents (n-H: n-hexane, Tol: toluene, THF: tetrahydrofuran, DCM: dichloromethane).

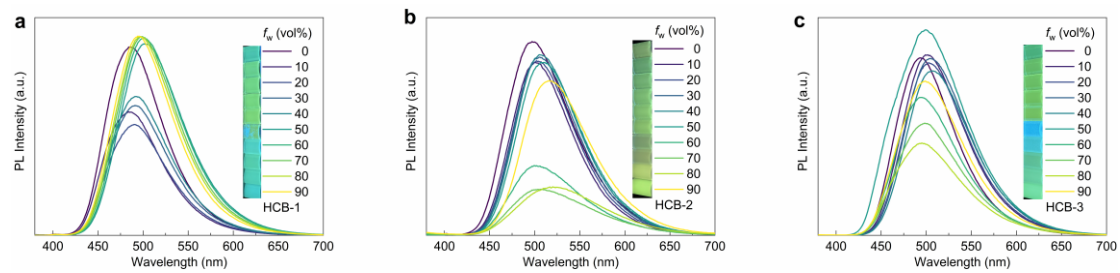

**Fig. S21** PL spectra of a) HCB-1, b) HCB-2, and c) HCB-3 in THF/H<sub>2</sub>O mixtures with different water fractions ( $f_w = 0\% \sim 90\%$ ).

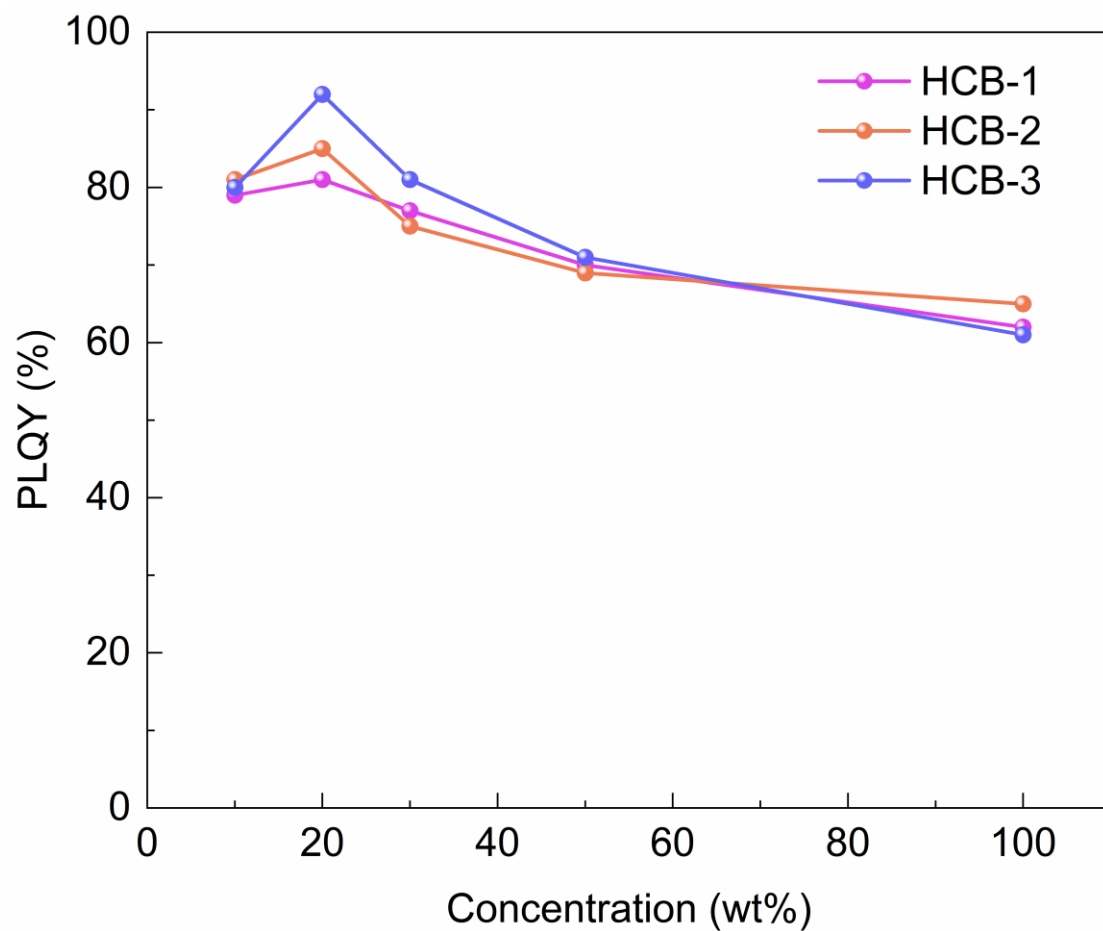

**Fig. S22** The doping concentration dependence on PLQY of HCB-1, HCB-2 and HCB-3 in mCP.

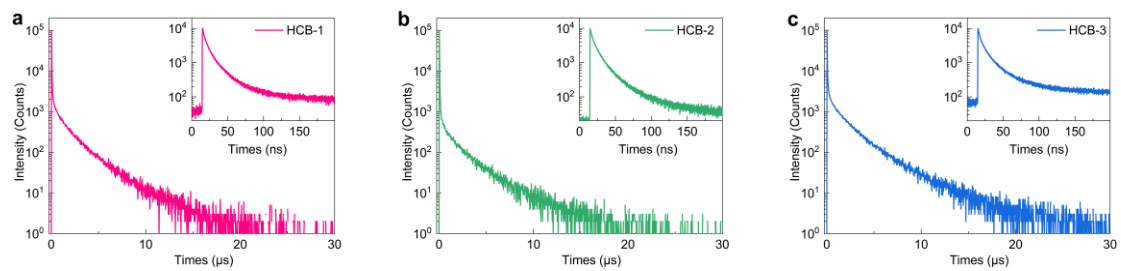

**Fig. S23** Transient PL decay curves of a) HCB-1, b) HCB-2, and c) HCB-3 in 100 wt% films.

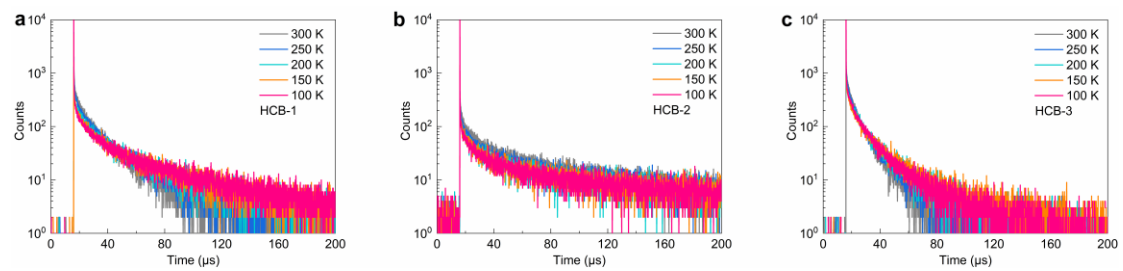

**Fig. S24** Temperature-dependent TRPL of a) HCB-1, b) HCB-2, and c) HCB-3 in doped films.

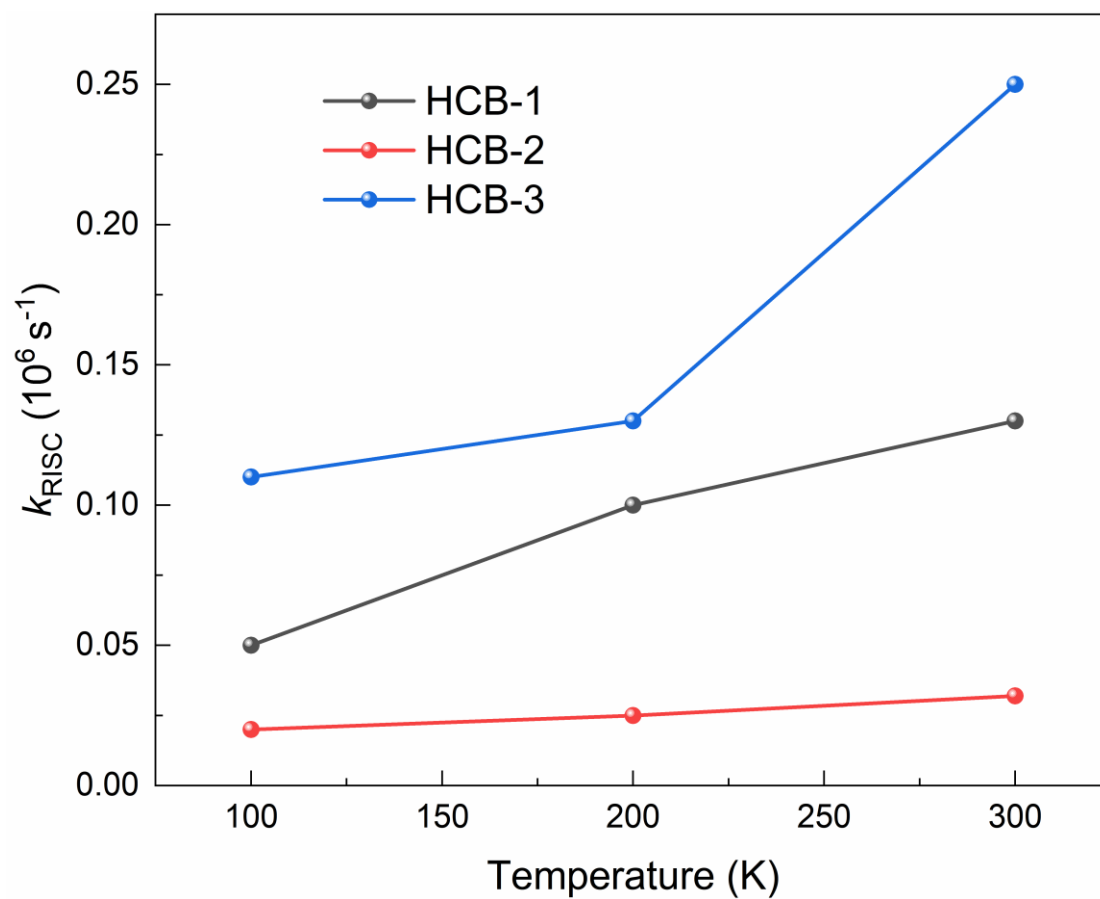

**Fig. S25** Temperature-dependent TRPL of a) HCB-1, b) HCB-2, and c) HCB-3 in doped films.

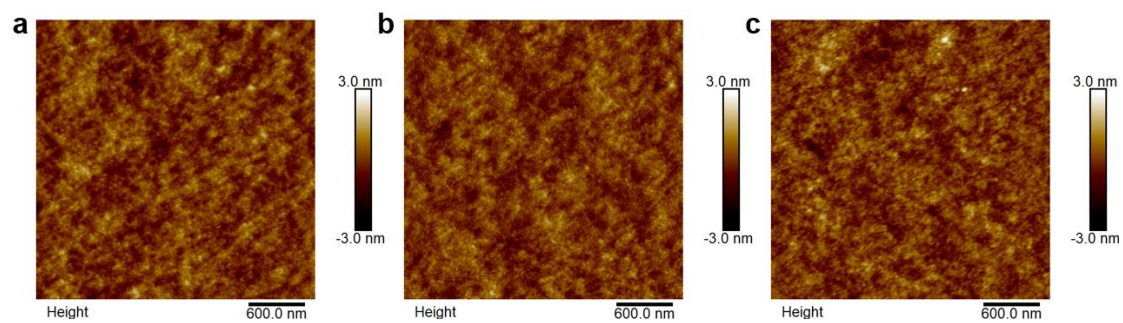

**Fig. S26** AFM images of 20 wt% doped films. a) HCB-1 (RMS=0.373 nm), b) HCB-2 (RMS=0.349 nm), c) HCB-3 (RMS=0.376 nm). (Solution-processed films structure: ITO/PEDOT: PSS/PVK/mCP: TADF emitter)

**Table S4** Photophysical characteristics of HCB-1, HCB-2, and HCB-3.

| Films <sup>a</sup> | $\Phi_p$         | $\Phi_d$         | $\tau_p$          | $\tau_d$                | $k_r$                                  | $k_{nr}$                               | $k_{ISC}$                              | $k_{RISC}$                             |
|--------------------|------------------|------------------|-------------------|-------------------------|----------------------------------------|----------------------------------------|----------------------------------------|----------------------------------------|
|                    | [%] <sup>b</sup> | [%] <sup>b</sup> | [ns] <sup>c</sup> | [ $\mu$ s] <sup>c</sup> | [ $10^6 \text{ s}^{-1}$ ] <sup>d</sup> | [ $10^6 \text{ s}^{-1}$ ] <sup>e</sup> | [ $10^6 \text{ s}^{-1}$ ] <sup>f</sup> | [ $10^6 \text{ s}^{-1}$ ] <sup>g</sup> |
| <b>HCB-1</b>       | 43               | 38               | 35.24             | 15.23                   | 12.10                                  | 2.84                                   | 13.44                                  | 0.13                                   |
| <b>HCB-2</b>       | 61               | 24               | 29.43             | 57.83                   | 20.58                                  | 3.63                                   | 9.77                                   | 0.03                                   |
| <b>HCB-3</b>       | 42               | 50               | 41.43             | 8.71                    | 10.15                                  | 0.88                                   | 13.11                                  | 0.25                                   |

<sup>a</sup> 20 wt% HCB-1, 20 wt% HCB-2 and 20 wt% HCB-3 doped in mCP film.

<sup>b</sup> Quantum yields for prompt fluorescence ( $\Phi_p$ ) and delayed fluorescence ( $\Phi_d$ ) for the neat film,  $\Phi_p + \Phi_d = \Phi_{PL}$ .

<sup>c</sup> Lifetime of the prompt component ( $\tau_p$ ) and delayed component ( $\tau_d$ ) as determined from the transient PL.

<sup>d</sup> Radiative rate constants of  $S_1$ ,  $k_r = \Phi_p/\tau_p + \Phi_d/\tau_d$ .

<sup>e</sup> Nonradiative rate constants of  $S_1$ ,  $k_{nr} = k_r(1 - \Phi_{PL})/\Phi_{PL}$ .

<sup>f</sup> Rate constants for ISC ( $S_1 \rightarrow T_1$ ),  $k_{ISC} = k_p - k_r - k_{nr}$ .

<sup>g</sup> Rate constants for RISC ( $T_1 \rightarrow S_1$ ),  $k_{RISC} = k_p k_d / k_{ISC} \cdot \Phi_d / \Phi_p$ .



**Table S5** Photophysical characteristics of HCB-1, HCB-2, and HCB-3 in 100 wt% films.

| Films <sup>a</sup> | $\Phi_p$         | $\Phi_d$         | $\tau_p$          | $\tau_d$                | $k_r$                                   | $k_{nr}$                                | $k_{ISC}$                               | $k_{RISC}$                              |
|--------------------|------------------|------------------|-------------------|-------------------------|-----------------------------------------|-----------------------------------------|-----------------------------------------|-----------------------------------------|
|                    | [%] <sup>b</sup> | [%] <sup>b</sup> | [ns] <sup>c</sup> | [ $\mu$ s] <sup>c</sup> | [ $10^7$ s <sup>-1</sup> ] <sup>d</sup> | [ $10^6$ s <sup>-1</sup> ] <sup>e</sup> | [ $10^6$ s <sup>-1</sup> ] <sup>f</sup> | [ $10^6$ s <sup>-1</sup> ] <sup>g</sup> |
| <b>HCB-1</b>       | 56               | 21               | 19.47             | 2.17                    | 2.87                                    | 8.59                                    | 14.02                                   | 0.64                                    |
| <b>HCB-2</b>       | 68               | 12               | 19.43             | 2.29                    | 3.51                                    | 8.77                                    | 7.59                                    | 0.52                                    |
| <b>HCB-3</b>       | 76               | 13               | 20.81             | 1.93                    | 3.67                                    | 4.53                                    | 6.84                                    | 0.61                                    |

<sup>a</sup> HCB-1, HCB-2 and HCB-3 in 100 wt% film.

<sup>b</sup> Quantum yields for prompt fluorescence ( $\Phi_p$ ) and delayed fluorescence ( $\Phi_d$ ) for the neat film,  $\Phi_p + \Phi_d = \Phi_{PL}$ .

<sup>c</sup> Lifetime of the prompt component ( $\tau_p$ ) and delayed component ( $\tau_d$ ) as determined from the transient PL.

<sup>d</sup> Radiative rate constants of S<sub>1</sub>,  $k_r = \Phi_p/\tau_p + \Phi_d/\tau_d$ .

<sup>e</sup> Nonradiative rate constants of S<sub>1</sub>,  $k_{nr} = k_r(1 - \Phi_{PL})/\Phi_{PL}$ .

<sup>f</sup> Rate constants for ISC (S<sub>1</sub> → T<sub>1</sub>),  $k_{ISC} = k_p - k_r - k_{nr}$ .

<sup>g</sup> Rate constants for RISC (T<sub>1</sub> → S<sub>1</sub>),  $k_{RISC} = k_p k_d / k_{ISC} \cdot \Phi_d / \Phi_p$ .

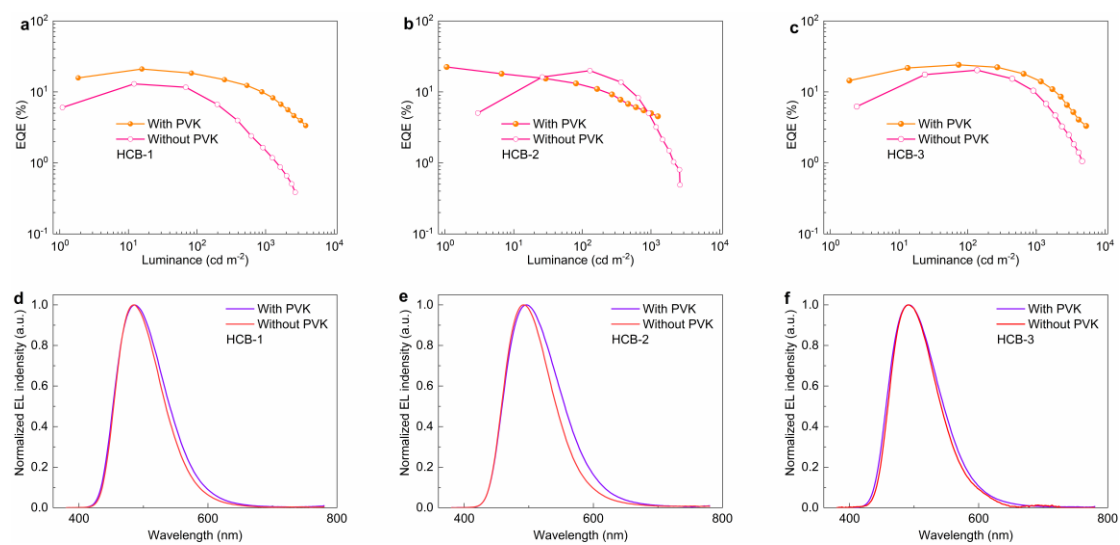

**Fig. S27** EL spectra and EQE of HCB-1 (a, d), HCB-2 (b, e) and HCB-3 (c, f) with PVK and without PVK.

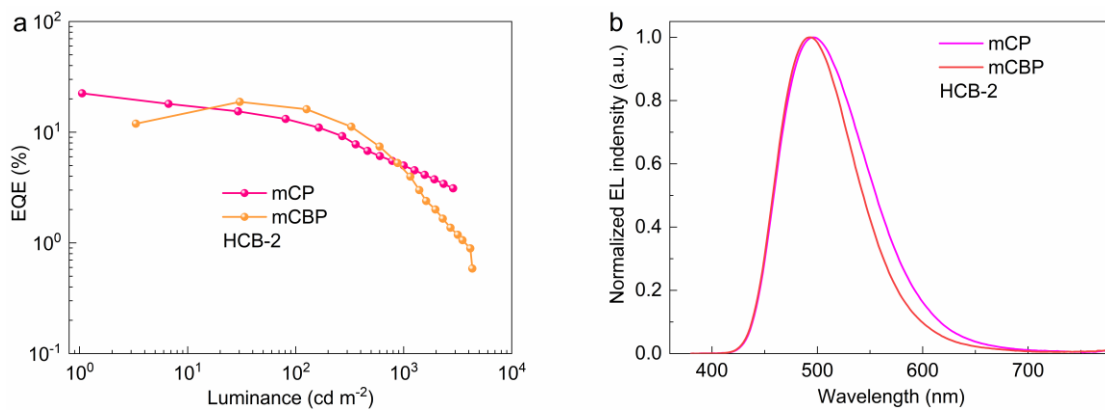

**Fig. S28** EL spectra and EQE of HCB-2 (a, b) using mCP and mCBP.

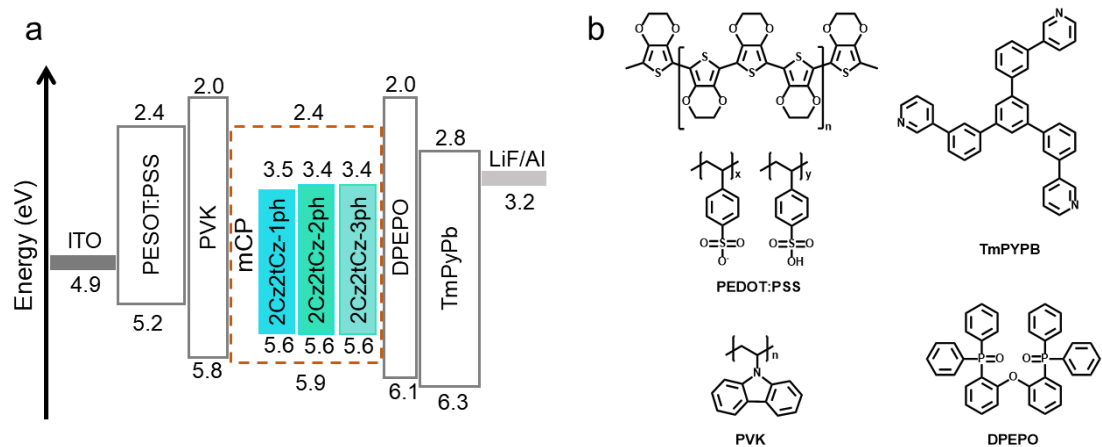

**Fig. S29** a) Energy-level diagram. b) Molecular structures employed in the devices.

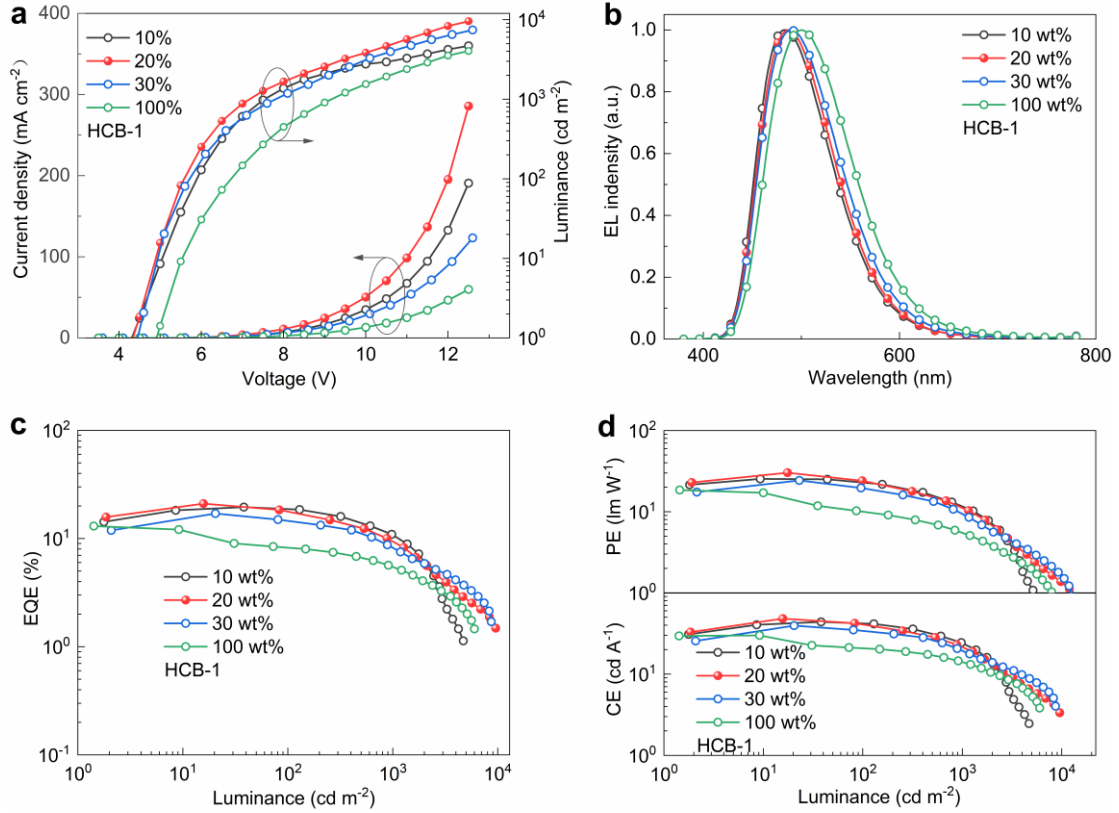

**Fig. S30** Device Performance of HCB-1. a)  $J$ - $V$ - $L$  curves, b) EL spectra. c) EQE as a function of luminance. d) PE and CE as a function of luminance.

**Table S6.** OLEDs performance based on HCB-1.

| EML                  | $V_{on}^a$ | EQE <sup>b</sup> | CE <sup>c</sup> | PE <sup>d</sup> | $\lambda_{EL}^e$ | FWHM <sup>e</sup> | CIE <sup>e</sup> |
|----------------------|------------|------------------|-----------------|-----------------|------------------|-------------------|------------------|
|                      | [V]        |                  |                 |                 |                  |                   |                  |
| <b>HCB-1-10 wt%</b>  | 4.3        | 19.5/18.8/11.2   | 43.8            | 25.4            | 484              | 85                | (0.18, 0.35)     |
| <b>HCB-1-20 wt%</b>  | 4.3        | 21.0/17.6/9.4    | 48.1            | 30.2            | 486              | 85                | (0.18, 0.36)     |
| <b>HCB-1-30 wt%</b>  | 4.4        | 17.0/14.2/8.0    | 39.4            | 24.3            | 488              | 88                | (0.19, 0.37)     |
| <b>HCB-1-100 wt%</b> | 4.9        | 12.1/8.3/5.4     | 29.9            | 18.5            | 500              | 92                | (0.21, 0.39)     |

<sup>a</sup> Turn-on voltage. <sup>b</sup> Maximum EQE, and values at 100 and 1000 cd/m<sup>2</sup>. <sup>c</sup> EQE<sub>roll-off</sub> = (EQE<sub>max</sub>-EQE<sub>100/1000</sub>)/EQE<sub>max</sub> <sup>d</sup> Maximum CE and PE. <sup>e</sup> EL peak, FWHM and CIE color coordinates.

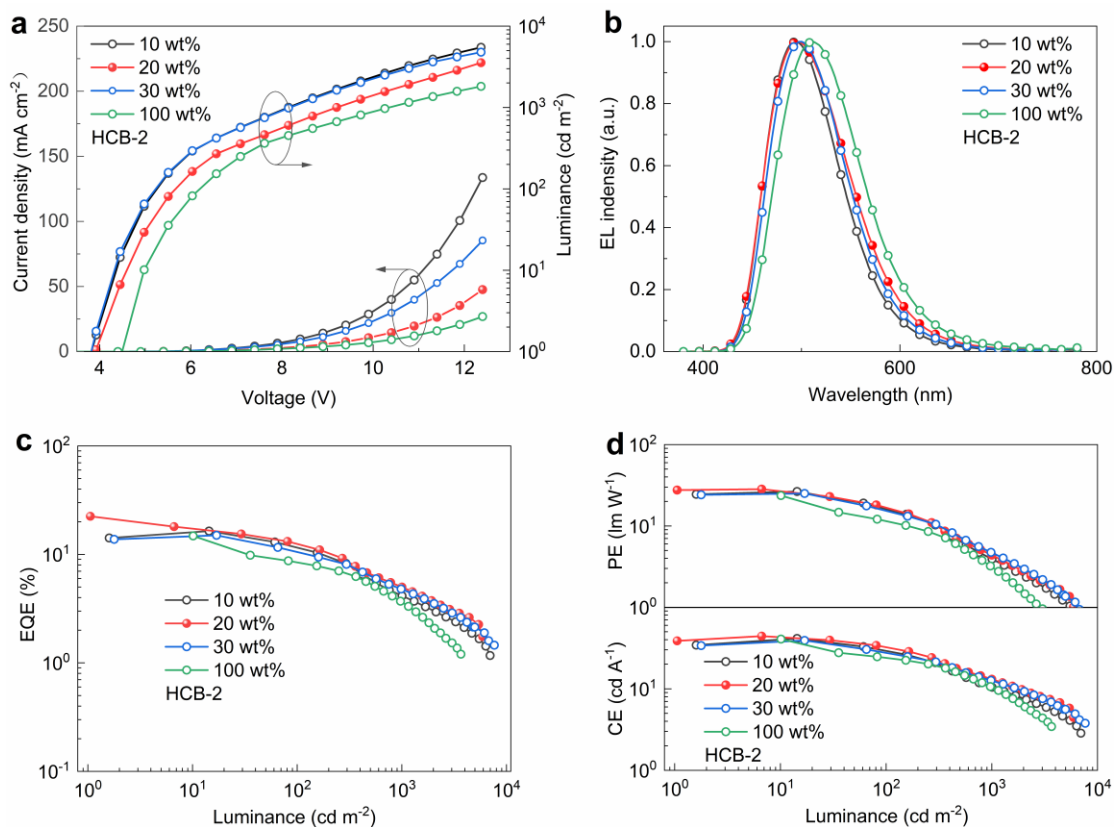

**Fig. S31** Device Performance of HCB-2. a)  $J$ - $V$ - $L$  curves, b) EL spectra. c) EQE as a function of luminance. d) PE and CE as a function of luminance.

**Table S7.** OLEDs performance based on HCB-2.

| EML                  | $V_{\text{on}}^{\text{a}}$ | EQE <sup>b</sup> | CE <sup>c</sup>       | PE <sup>c</sup>       | $\lambda_{\text{EL}}^{\text{d}}$ | FWHM <sup>e</sup> | CIE <sup>e</sup> |
|----------------------|----------------------------|------------------|-----------------------|-----------------------|----------------------------------|-------------------|------------------|
|                      | [V]                        | [%]              | [cd A <sup>-1</sup> ] | [lm W <sup>-1</sup> ] | [nm]                             | [nm]              | (x, y)           |
| <b>HCB-2-10 wt%</b>  | 4.3                        | 16.4/11.5/4.2    | 41.3                  | 26.5                  | 494                              | 88                | (0.19, 0.40)     |
| <b>HCB-2-20 wt%</b>  | 4.4                        | 22.4/12.4/5.0    | 44.2                  | 28.3                  | 496                              | 92                | (0.23, 0.39)     |
| <b>HCB-2-30 wt%</b>  | 4.3                        | 14.9/10.6/4.8    | 39.1                  | 25.1                  | 500                              | 91                | (0.21, 0.43)     |
| <b>HCB-2-100 wt%</b> | 4.9                        | 14.8/8.3/3.7     | 40.6                  | 23.6                  | 512                              | 95                | (0.24, 0.48)     |

<sup>a</sup> Turn-on voltage. <sup>b</sup> Maximum EQE, and values at 100 and 1000 cd/m<sup>2</sup>. <sup>c</sup> EQE<sub>roll-off</sub> = (EQE<sub>max</sub>-EQE<sub>100/1000</sub>)/EQE<sub>max</sub> <sup>d</sup> Maximum CE and PE. <sup>e</sup> EL peak, FWHM and CIE color coordinates.

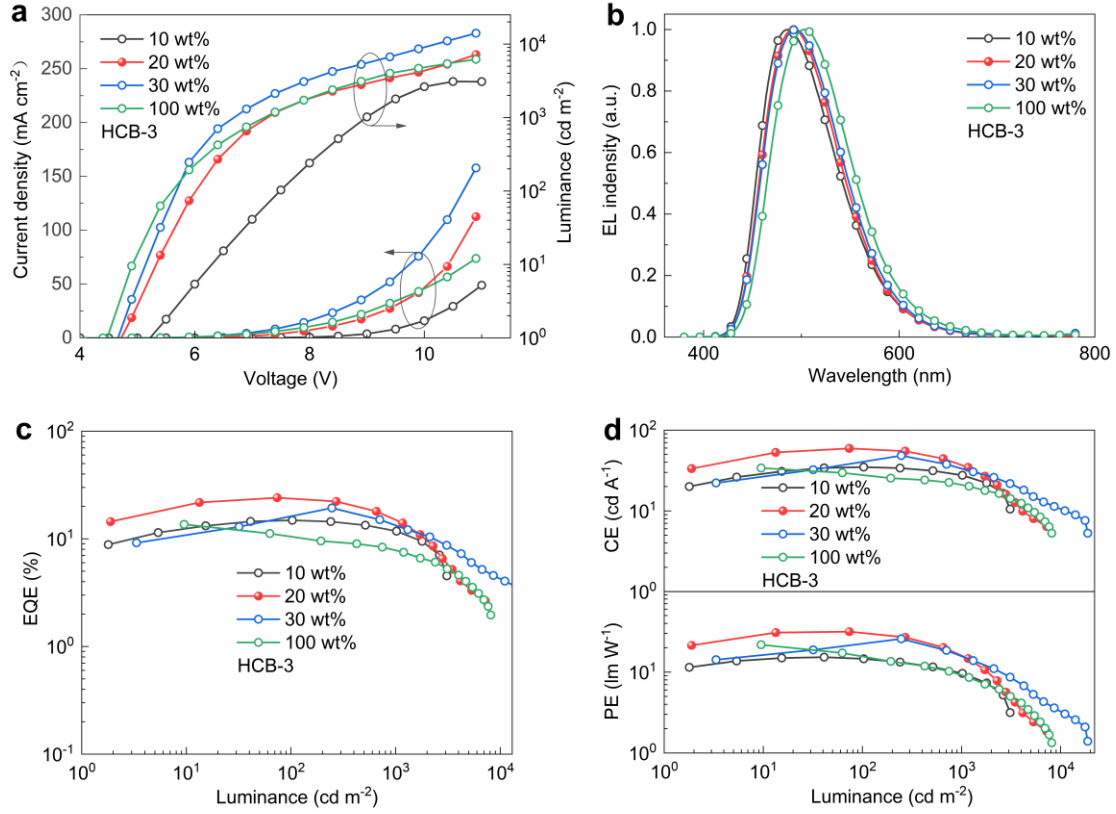

**Fig. S32** Device Performance of HCB-3. a)  $J$ - $V$ - $L$  curves, b) EL spectra. c) EQE as a function of luminance. d) PE and CE as a function of luminance.

**Table S8.** OLEDs performance based on HCB-3.

| EML                  | $V_{on}^a$ | EQE <sup>b</sup> | CE <sup>c</sup>       | PE <sup>d</sup>       | $\lambda_{EL}^e$ | FWHM <sup>e</sup> | CIE <sup>e</sup> |
|----------------------|------------|------------------|-----------------------|-----------------------|------------------|-------------------|------------------|
|                      | [V]        | [%]              | [cd A <sup>-1</sup> ] | [lm W <sup>-1</sup> ] | [nm]             | [nm]              | (x, y)           |
| <b>HCB-3-10 wt%</b>  | 5.2        | 14.8/14.5/11.7   | 34.8                  | 15.2                  | 486              | 87                | (0.18, 0.37)     |
| <b>HCB-3-20 wt%</b>  | 4.7        | 24.1/23.7/15.2   | 59.4                  | 31.6                  | 492              | 87                | (0.19, 0.39)     |
| <b>HCB-3-30 wt%</b>  | 4.6        | 19.3/16.2/13.2   | 48.3                  | 25.7                  | 494              | 87                | (0.19, 0.41)     |
| <b>HCB-3-100 wt%</b> | 4.4        | 13.6/10.5/7.8    | 34.0                  | 21.8                  | 502              | 89                | (0.20, 0.44)     |

<sup>a</sup> Turn-on voltage. <sup>b</sup> Maximum EQE, and values at 100 and 1000 cd/m<sup>2</sup>. <sup>c</sup> EQE<sub>roll-off</sub> = (EQE<sub>max</sub>-EQE<sub>100/1000</sub>)/EQE<sub>max</sub> <sup>d</sup> Maximum CE and PE. <sup>e</sup> EL peak, FWHM and CIE color coordinates.

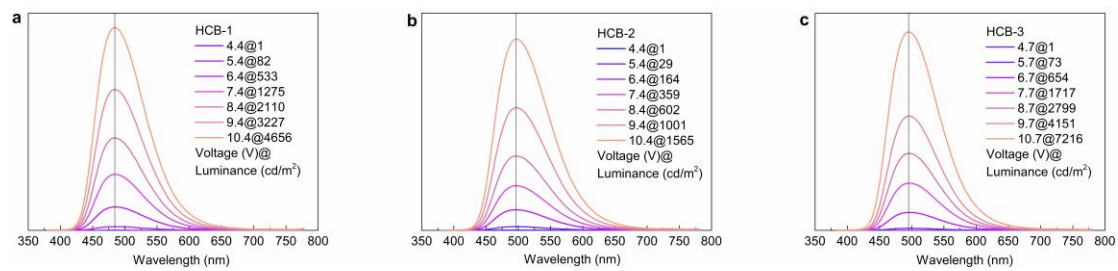

**Fig. S33** The EL characteristics of a) HCB-1, b) HCB-2, and c) HCB-3 under different voltages and brightness levels.



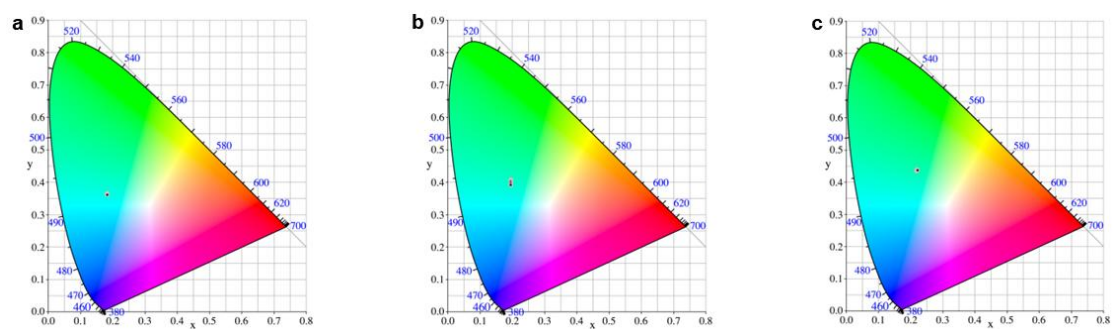

**Fig. S34** The CIE coordinates of a) HCB-1 (4.4~10.4 V), b) HCB-2 (4.4~10.4 V), and c) HCB-3 (4.7~10.7 V) under different voltages and brightness levels.

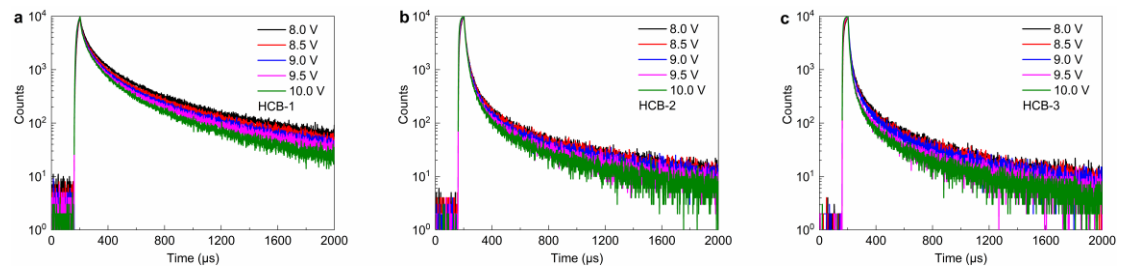

**Fig. S35** Transient EL spectra at  $1000 \text{ cd m}^{-2}$  of device HCB 1-3.

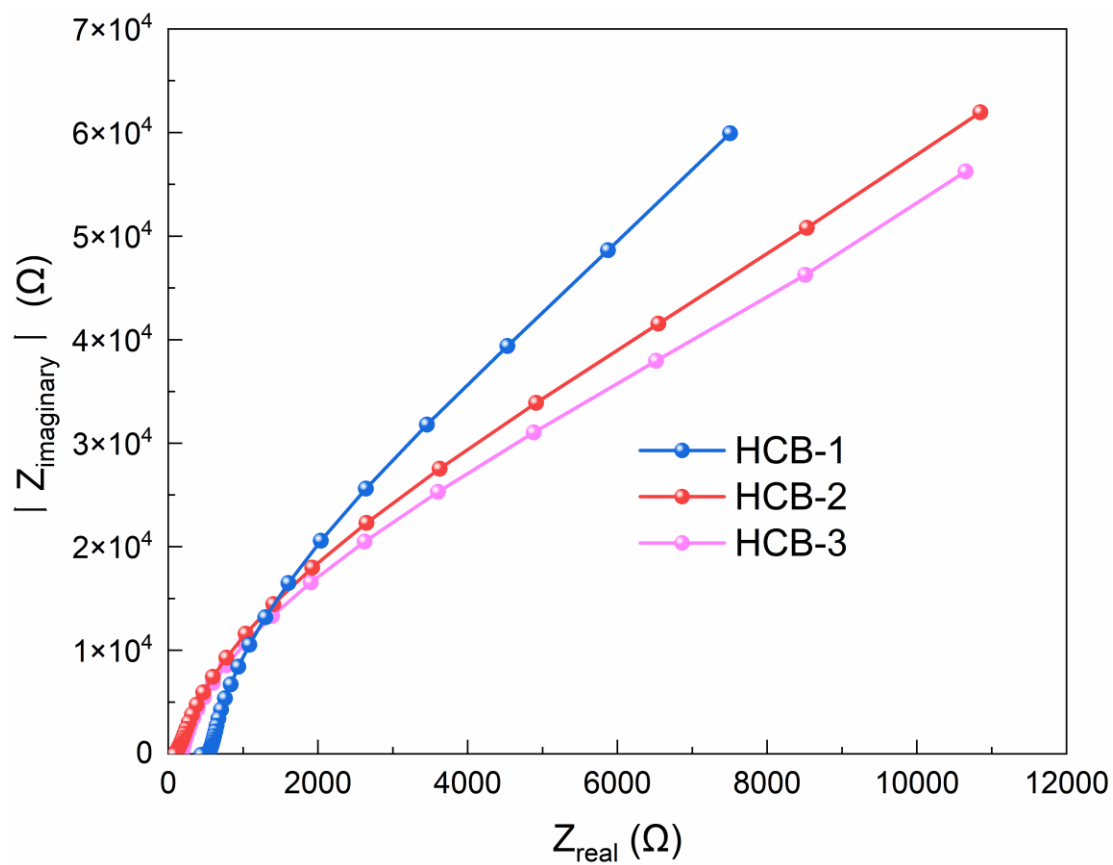

**Fig. S36** EIS measurement of different devices.

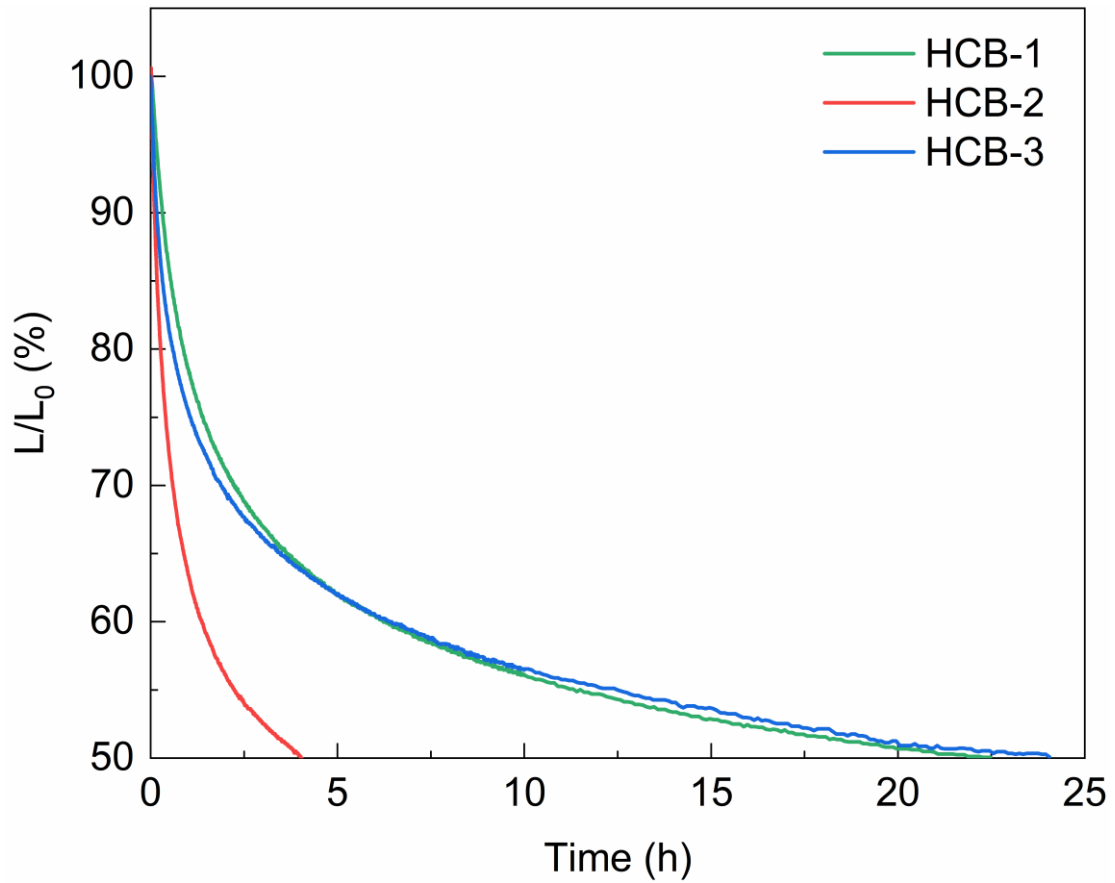

**Fig. S37** The operation lifetime of the devices (at an initial luminance of  $100 \text{ cd m}^{-2}$ ).  $L$ , luminance of the device during the operational lifetime measurement;  $L_0$ , initial luminance of the device.

**Table S9.** EL performances of the reported blue and sky blue TADF-OLEDs by solution process.

| Emitters         | V <sub>on</sub> <sup>a</sup><br>(V) | EQE <sub>max</sub> <sup>b</sup><br>(%) | EQE <sub>100</sub> <sup>b</sup><br>(%) | EQE <sub>1000</sub> <sup>b</sup><br>(%) | EQE <sub>roll-off</sub> <sup>c</sup><br>(%) | λ <sub>EL</sub> <sup>d</sup><br>(nm) | Ref.             |
|------------------|-------------------------------------|----------------------------------------|----------------------------------------|-----------------------------------------|---------------------------------------------|--------------------------------------|------------------|
| <b>HCB-1</b>     | <b>4.3</b>                          | <b>21.0</b>                            | <b>17.6</b>                            | <b>9.4</b>                              | <b>16.1/55.2</b>                            | <b>486</b>                           | <b>This work</b> |
| <b>HCB-2</b>     | <b>4.4</b>                          | <b>22.4</b>                            | <b>12.4</b>                            | <b>5.0</b>                              | <b>44.6/77.6</b>                            | <b>496</b>                           | <b>This work</b> |
| <b>HCB-3</b>     | <b>4.7</b>                          | <b>24.1</b>                            | <b>23.7</b>                            | <b>15.2</b>                             | <b>1.7/36.9</b>                             | <b>492</b>                           | <b>This work</b> |
| TPA-s-Mes*B      | 4.0                                 | 10.3                                   | 7.8                                    | -                                       | 24.2/-                                      | 454                                  | 1                |
| Without PFN-Br   | 4.8                                 | 17.5                                   | 13.6                                   | -                                       | 22.2/-                                      | 473                                  | 2                |
| 0.2 mg/ml PFN-Br | 4.5                                 | 21.2                                   | 19.3                                   | -                                       | 8.9/-                                       | 473                                  | 2                |
| 0.5 mg/ml PFN-Br | 4.8                                 | 10.4                                   | 7.78                                   | -                                       | 25.1/-                                      | 473                                  | 2                |
| TTT-Ph-Ac        | 4.4                                 | 23.23                                  | -                                      | -                                       | -/-                                         | 492                                  | 3                |
| B-oCz            | 4.4                                 | 8.0                                    | 6.9                                    | 2.6                                     | 13.7/67.5                                   | 463                                  | 4                |
| B-oTC            | 3.9                                 | 19.1                                   | 17.0                                   | 9.7                                     | 11.0/49.2                                   | 474                                  | 4                |
| DCzIPN           | 5.1                                 | 9.5                                    | -                                      | 7.6                                     | -/20.0                                      | 466                                  | 5                |
| DMeCzIPN         | 3.8                                 | 21.6                                   | -                                      | 19.6                                    | -/9.2                                       | 478                                  | 5                |
| T-CNDF-T-tCz     | 6.3                                 | 21.0                                   | -                                      | -                                       | -/-                                         | 484                                  | 6                |
| 4CzFCN           | 3.6                                 | 21.0                                   | 20.2                                   | 13.6                                    | 3.8/35.2                                    | 480                                  | 7                |
| MeCz-4CzCN       | 2.9                                 | 21.8                                   | 21.3                                   | 19.0                                    | 2.2/12.8                                    | 486                                  | 8                |
| PhCz-4CzCN       | 2.9                                 | 20.6                                   | 20.0                                   | 18.2                                    | 2.9/11.6                                    | 475                                  | 8                |
| PhDCz-4CzCN      | 3.1                                 | 10.0                                   | 9.8                                    | 7.9                                     | 2.0/21.0                                    | 465                                  | 8                |
| PMB-SPAc         | 3.6                                 | 26.04                                  | 21.94                                  | -                                       | 15.7/-                                      | 492                                  | 9                |
| CzDMAC-DPS       | 3.6                                 | 12.2                                   | 6.9                                    | 4.5                                     | 43.4/63.1                                   | 492                                  | 10               |
| DCzDMAC-DPS      | 5.2                                 | 2.2                                    | 1.5                                    | -                                       | 31.8/-                                      | 464                                  | 10               |

<sup>a</sup> Turn-on voltage at 1 cd/m<sup>2</sup>. <sup>b</sup> EQE at maximum, 100 cd/m<sup>2</sup>, and 1000 cd/m<sup>2</sup>. <sup>c</sup> EQE<sub>roll-off</sub>

<sup>d</sup> EL peak.  
 $\text{off} = (\text{EQE}_{\text{max}} - \text{EQE}_{100/1000}) / \text{EQE}_{\text{max}}$

**Table S10.** EL performances of the reported blue and sky blue TADF-OLEDs for vacuum-deposited devices.

| Emitters           | V <sub>on</sub> <sup>a</sup><br>(V) | EQE <sub>max</sub> <sup>b</sup><br>(%) | EQE <sub>100</sub> <sup>b</sup><br>(%) | EQE <sub>1000</sub> <sup>b</sup><br>(%) | EQE <sub>roll-off</sub> <sup>c</sup><br>(%) | Lifetime <sup>d</sup><br>(h)    | λ <sub>EL</sub> <sup>e</sup><br>(nm) | Ref.             |
|--------------------|-------------------------------------|----------------------------------------|----------------------------------------|-----------------------------------------|---------------------------------------------|---------------------------------|--------------------------------------|------------------|
| <b>HCB-1</b>       | <b>4.3</b>                          | <b>21.0</b>                            | <b>17.6</b>                            | <b>9.4</b>                              | <b>16.1/55.2</b>                            | <b>LT<sub>50</sub>@100=22.4</b> | <b>486</b>                           | <b>This work</b> |
| <b>HCB-2</b>       | <b>4.4</b>                          | <b>22.4</b>                            | <b>12.4</b>                            | <b>5.0</b>                              | <b>44.6/77.6</b>                            | <b>LT<sub>50</sub>@100=4.0</b>  | <b>496</b>                           | <b>This work</b> |
| <b>HCB-3</b>       | <b>4.7</b>                          | <b>24.1</b>                            | <b>23.7</b>                            | <b>15.2</b>                             | <b>1.7/36.9</b>                             | <b>LT<sub>50</sub>@100=24.0</b> | <b>492</b>                           | <b>This work</b> |
| BN-C               | 2.6                                 | 22.3                                   | 21.7                                   | 15.8                                    | 2.7/29.1                                    | LT <sub>50</sub> @1000=33.5     | 477                                  | [11]             |
| BN-Si              | 2.6                                 | 23.2                                   | 23.2                                   | 21.7                                    | -/6.5                                       | LT <sub>50</sub> @1000=428.6    | 477                                  | [11]             |
| BN-Ge              | 2.6                                 | 21.2                                   | 21.1                                   | 19.1                                    | 0.4/9.9                                     | LT <sub>50</sub> @1000=98.9     | 473                                  | [11]             |
| BN-Si <sup>k</sup> | 2.7                                 | 25.3                                   | 24.6                                   | 21.4                                    | 2.7/15.4                                    | LT <sub>50</sub> @1000=308      | 476                                  | [11]             |
| B1                 | 3.8                                 | 32.5                                   | 16.8                                   | 6.5                                     | 48/80                                       | -                               | 450                                  | [12]             |
| B2                 | 3.3                                 | 30.1                                   | 17.8                                   | 8.5                                     | 40.8/71.7                                   | -                               | 452                                  | [12]             |
| DPA-B2             | 3.6                                 | 28.9                                   | 19.8                                   | 9.3                                     | 31.4/67.8                                   | LT <sub>50</sub> @100=137.1     | 444                                  | [13]             |
| DPA-B3             | 3.6                                 | 37.7                                   | 33.7                                   | 21.0                                    | 10.6/44.2                                   | LT <sub>50</sub> @100=317.3     | 450                                  | [13]             |
| DPA-B4             | 3.6                                 | 39.2                                   | 36.4                                   | 28.7                                    | 7.1/26.7                                    | LT <sub>50</sub> @100=418.0     | 457                                  | [13]             |
| Cz-B4              | 3.6                                 | 32.1                                   | 26.9                                   | 16.1                                    | 16.2/49.8                                   | LT <sub>50</sub> @100=777.4     | 457                                  | [13]             |
| DPA-B4 (HF)        | 3.6                                 | 44.4                                   | 44.3                                   | 38.8                                    | 0.2/12.6                                    | LT <sub>50</sub> @100=409.6     | 459                                  | [13]             |
| TSF-A              | -                                   | 29.2                                   | -                                      | 24.1                                    | -/17.4                                      | LT <sub>80</sub> @1000=398      | 468                                  | [14]             |
| TSF-B              | -                                   | 33.1                                   | -                                      | 29.0                                    | -/12.3                                      | LT <sub>80</sub> @1000=1365     | 468                                  | [14]             |
| TSF-C              | -                                   | 28.2                                   | -                                      | 21.3                                    | -/24.4                                      | LT <sub>80</sub> @1000=126      | 468                                  | [14]             |
| TSF-D              | -                                   | 30.4                                   | -                                      | 27.2                                    | -/10.5                                      | LT <sub>80</sub> @1000=561      | 468                                  | [14]             |
| 4tCzBN-PhCN        |                                     | 37.1                                   | -                                      | 34.2                                    | -/1.8                                       | LT <sub>95</sub> @5000=37.6     | 501                                  | [15]             |
| 4CzBN-PhCN         |                                     | 28.0                                   | -                                      | 26.6                                    | -/5.0                                       | LT <sub>95</sub> @5000=26.7     | 489                                  | [15]             |

<sup>a</sup> Turn-on voltage at 1 cd/m<sup>2</sup>. <sup>b</sup> EQE at maximum, 100 cd/m<sup>2</sup>, and 1000 cd/m<sup>2</sup>. <sup>c</sup> EQE<sub>roll-off</sub>

<sub>off</sub> = (EQE<sub>max</sub>-EQE<sub>100/1000</sub>)/EQE<sub>max</sub>. <sup>e</sup> where LT<sub>x</sub>@y indicates the time to reach x% of the initial

luminance of y cd m<sup>-2</sup> <sup>e</sup> EL peak.

---

## References

- 1 G. Liao, J. Lei, S. Li, M. Liu, Y. Qiao, K. Liu, N. Wang, Q. Niu and X. Yin, *Adv. Opt. Mater.*, 2024, **12**, 2301242.
- 2 M. Li, J. Jiang, Y. Ning, S. Zhao, W.F.A. Masri, S. Wageh and A. Al-Ghamdi, *Synth. Met.*, 2022, **289**, 117122.
- 3 X. Chen, S. Wang, H.L. Lee, J.Y. Lee, X. Liao, L. Li, W. Zhu and Y. Wang, *Adv. Opt. Mater.*, 2021, **9**, 2101518.
- 4 X.-L. Chen, J.-H. Jia, R. Yu, J.-Z. Liao, M.-X. Yang and C.-Z. Lu, *Angew. Chem., Int. Ed.*, 2017, **56**, 15006-15009.
- 5 G. Kreiza, D. Berenis, D. Banevičius, S. Juršėnas, T. Javorskis, E. Orentas and K. Kazlauskas, *Chem. Eng. J.*, 2021, **412**, 128574.
- 6 X. Zheng, R. Huang, C. Zhong, G. Xie, W. Ning, M. Huang, F. Ni, F.B. Dias and C. Yang, *Adv. Sci.*, 2020, **7**, 1902087.
- 7 Z. He, C. Wang, J. Zhao, X. Du, H. Yang, P. Zhong, C. Zheng, H. Lin, S. Tao and X. Zhang, *J. Mater. Chem. C*, 2019, **7**, 11806-11812.
- 8 X. Ban, F. Chen, J. Pan, Y. Liu, A. Zhu, W. Jiang and Y. Sun, *Chem. Eur. J*, 2020, **26**, 3090-3102.
- 9 B. Li, Z. Ding, Z. Wu, M. Liu, S. Chen, D. Chen, Z. Li, L. Sang, Y. Liu, L. Lin, W. Zhu and X. Wan, *Chem. Eng. J.*, 2023, **476**, 146484.
- 10 J. Luo, S. Gong, Y. Gu, T. Chen, Y. Li, C. Zhong, G. Xie and C. Yang, *J. Mater. Chem. C*, 2016, **4**, 2442-2446.
- 11 S.-J. Li, X. Tang, C. H. Ng, J. Y. Lim, W. K. Tang, W.-C. Chen, Y. Huo, M. Ng, S. S. Chen, D. Zhang, L. Duan and M.-C. Tang, *Adv. Optical Mater.*, 2025, 2402479.
- 12 Y. Mei, J. Li, D. Liu, M. Xu, Y. Li and H. Wan, *Adv. Optical Mater.*, 2024, 2402964.
- 13 T. Hua, X. Cao, J. Miao, X. Yin, Z. Chen, Z. Huang and C. Yang *Nat. Photon.* 2024, **18**, 1161–1169
- 14 T. Huang, Q. Wang, H., Y. Zhang, G. Zhan, D. Zhang and L. Duan, *Nat. Photon.* 2024, **18**, 516–523
- 15 T. Huang, Q. Wang, H. Zhang, Y. Xin, Y. Zhang, X. Chen, D. Zhang and L. Duan, *Nat. Mater.* 2024, **23**, 1523–1530.
